# Supplementary material for: In vitro fertilisation (IVF) versus intracytoplasmic sperm injection (ICSI) in patients without severe male factor infertility: study protocol for the randomised, controlled, multicentre trial INVICSI
Source: PubMed Central journal article supplement — BMJ Open. 2021 Jun 24;11(6):e051058. doi: 10.1136/bmjopen-2021-051058 (PMC8231059; doi:10.1136/bmjopen-2021-051058), 2021-06-24
Supplement: bmjopen-2021-051058.draft_revisions.pdf [file bmjopen-2021-051058.draft_revisions.pdf]

# BMJ Open

BMJ Open is committed to open peer review. As part of this commitment we make the peer review history of every article we publish publicly available.

When an article is published we post the peer reviewers' comments and the authors' responses online. We also post the versions of the paper that were used during peer review. These are the versions that the peer review comments apply to.

The versions of the paper that follow are the versions that were submitted during the peer review process. They are not the versions of record or the final published versions. They should not be cited or distributed as the published version of this manuscript.

BMJ Open is an open access journal and the full, final, typeset and author-corrected version of record of the manuscript is available on our site with no access controls, subscription charges or pay-per-view fees (<http://bmjopen.bmj.com>).

If you have any questions on BMJ Open's open peer review process please email [info.bmjopen@bmj.com](mailto:info.bmjopen@bmj.com)

# BMJ Open

## **In vitro fertilisation (IVF) versus intracytoplasmic sperm injection (ICSI) in patients without severe male factor infertility: study protocol for the randomised, controlled, multicentre trial INVICSI**

|                               |                                                                                                                                                                                                                                                                                                                                                                                                                                                                                                                                                                                                                                                                                                                                                                                                                                                                                                                                                                                                                                                                                                                                                                                                                                                                                                                                                                                                                                                                                                                                                                                                                                                                                                                                                                                                                                                                                                                                                                                                                                       |
|-------------------------------|---------------------------------------------------------------------------------------------------------------------------------------------------------------------------------------------------------------------------------------------------------------------------------------------------------------------------------------------------------------------------------------------------------------------------------------------------------------------------------------------------------------------------------------------------------------------------------------------------------------------------------------------------------------------------------------------------------------------------------------------------------------------------------------------------------------------------------------------------------------------------------------------------------------------------------------------------------------------------------------------------------------------------------------------------------------------------------------------------------------------------------------------------------------------------------------------------------------------------------------------------------------------------------------------------------------------------------------------------------------------------------------------------------------------------------------------------------------------------------------------------------------------------------------------------------------------------------------------------------------------------------------------------------------------------------------------------------------------------------------------------------------------------------------------------------------------------------------------------------------------------------------------------------------------------------------------------------------------------------------------------------------------------------------|
| Journal:                      | <i>BMJ Open</i>                                                                                                                                                                                                                                                                                                                                                                                                                                                                                                                                                                                                                                                                                                                                                                                                                                                                                                                                                                                                                                                                                                                                                                                                                                                                                                                                                                                                                                                                                                                                                                                                                                                                                                                                                                                                                                                                                                                                                                                                                       |
| Manuscript ID                 | bmjopen-2021-051058                                                                                                                                                                                                                                                                                                                                                                                                                                                                                                                                                                                                                                                                                                                                                                                                                                                                                                                                                                                                                                                                                                                                                                                                                                                                                                                                                                                                                                                                                                                                                                                                                                                                                                                                                                                                                                                                                                                                                                                                                   |
| Article Type:                 | Protocol                                                                                                                                                                                                                                                                                                                                                                                                                                                                                                                                                                                                                                                                                                                                                                                                                                                                                                                                                                                                                                                                                                                                                                                                                                                                                                                                                                                                                                                                                                                                                                                                                                                                                                                                                                                                                                                                                                                                                                                                                              |
| Date Submitted by the Author: | 11-Mar-2021                                                                                                                                                                                                                                                                                                                                                                                                                                                                                                                                                                                                                                                                                                                                                                                                                                                                                                                                                                                                                                                                                                                                                                                                                                                                                                                                                                                                                                                                                                                                                                                                                                                                                                                                                                                                                                                                                                                                                                                                                           |
| Complete List of Authors:     | <p>Berntsen, Sine; Hvidovre Hospital, Department of Obstetrics and Gynaecology, The Fertility Clinic, Copenhagen University Hospital Hvidovre</p> <p>Nøhr, Bugge; Herlev Hospital, Department of Obstetrics and Gynaecology, The Fertility Clinic, Copenhagen University Hospital Herlev Grøndahl, Marie Louise; Herlev Hospital, Department of Obstetrics and Gynaecology, The Fertility Clinic, Copenhagen University Hospital Herlev Petersen, Morten; Rigshospitalet, The Fertility Clinic, Copenhagen University Hospital Rigshospitalet</p> <p>Andersen, Lars; North Zealand Hospital, Department of Obstetrics and Gynaecology, Copenhagen University Hospital North Zealand</p> <p>Mikkelsen, Anne Lis; Zealand University Hospital Koge, Department of Obstetrics and Gynaecology, The Fertility Clinic, Zealand University Hospital Koege</p> <p>Knudsen, Ulla; Regional Hospital Horsens, Department of Obstetrics and Gynaecology, The Fertility Clinic, The Regional Hospital Horsens</p> <p>Prætorius, Lisbeth; Hvidovre Hospital, Department of Obstetrics and Gynaecology, The Fertility Clinic, Copenhagen University Hospital Hvidovre</p> <p>Zedeler, Anne; Hvidovre Hospital, Department of Obstetrics and Gynaecology, The Fertility Clinic, Copenhagen University Hospital Hvidovre</p> <p>Nielsen, Henriette; Hvidovre Hospital, Department of Obstetrics and Gynaecology, The Fertility Clinic, Copenhagen University Hospital Hvidovre; University of Copenhagen Faculty of Health and Medical Sciences, Institute of Clinical Medicine</p> <p>Pinborg, Anja; Rigshospitalet, The Fertility Clinic, Copenhagen University Hospital Rigshospitalet; University of Copenhagen Faculty of Health and Medical Sciences, Institute of Clinical Medicine</p> <p>Freiesleben, Nina; Hvidovre Hospital, Department of Obstetrics and Gynaecology, The Fertility Clinic, Copenhagen University Hospital Hvidovre; University of Copenhagen Faculty of Health and Medical Sciences, Institute of Clinical Medicine</p> |
| Keywords:                     | Subfertility < GYNAECOLOGY, Male infertility < UROLOGY, Reproductive medicine < GYNAECOLOGY, SEXUAL MEDICINE                                                                                                                                                                                                                                                                                                                                                                                                                                                                                                                                                                                                                                                                                                                                                                                                                                                                                                                                                                                                                                                                                                                                                                                                                                                                                                                                                                                                                                                                                                                                                                                                                                                                                                                                                                                                                                                                                                                          |
|                               |                                                                                                                                                                                                                                                                                                                                                                                                                                                                                                                                                                                                                                                                                                                                                                                                                                                                                                                                                                                                                                                                                                                                                                                                                                                                                                                                                                                                                                                                                                                                                                                                                                                                                                                                                                                                                                                                                                                                                                                                                                       |

1  
2  
3  
4  
5  
6  
7  
8  
9  
10  
11  
12  
13  
14  
15  
16  
17  
18  
19  
20  
21  
22  
23  
24  
25  
26  
27  
28  
29  
30  
31  
32  
33  
34  
35  
36  
37  
38  
39  
40  
41  
42  
43  
44  
45  
46  
47  
48  
49  
50  
51  
52  
53  
54  
55  
56  
57  
58  
59  
60

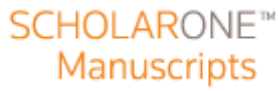

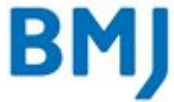

I, the Submitting Author has the right to grant and does grant on behalf of all authors of the Work (as defined in the below author licence), an exclusive licence and/or a non-exclusive licence for contributions from authors who are: i) UK Crown employees; ii) where BMJ has agreed a CC-BY licence shall apply, and/or iii) in accordance with the terms applicable for US Federal Government officers or employees acting as part of their official duties; on a worldwide, perpetual, irrevocable, royalty-free basis to BMJ Publishing Group Ltd ("BMJ") its licensees and where the relevant Journal is co-owned by BMJ to the co-owners of the Journal, to publish the Work in this journal and any other BMJ products and to exploit all rights, as set out in our [licence](#).

The Submitting Author accepts and understands that any supply made under these terms is made by BMJ to the Submitting Author unless you are acting as an employee on behalf of your employer or a postgraduate student of an affiliated institution which is paying any applicable article publishing charge ("APC") for Open Access articles. Where the Submitting Author wishes to make the Work available on an Open Access basis (and intends to pay the relevant APC), the terms of reuse of such Open Access shall be governed by a Creative Commons licence – details of these licences and which [Creative Commons](#) licence will apply to this Work are set out in our licence referred to above.

Other than as permitted in any relevant BMJ Author's Self Archiving Policies, I confirm this Work has not been accepted for publication elsewhere, is not being considered for publication elsewhere and does not duplicate material already published. I confirm all authors consent to publication of this Work and authorise the granting of this licence.

1 INVICSI: study protocol for a randomised, controlled multicentre trial

2 Version: 4.0

3 Date: March 10, 2021

4  
5 **In vitro fertilisation (IVF) versus intracytoplasmic sperm injection (ICSI) in patients without**  
6 **severe male factor infertility: study protocol for the randomised, controlled, multicentre trial**

7  
8 **INVICSI**

9  
10  
11  
12 Sine Berntsen<sup>1,\*</sup>, Bugge Nøhr<sup>2</sup>, Marie Louise Grøndahl<sup>2</sup>, Morten Rønn Petersen<sup>3</sup>, Lars Franch Andersen<sup>4</sup>, Anne Lis  
13 Mikkelsen Englund<sup>5</sup>, Ulla Breth Knudsen<sup>6,7</sup>, Lisbeth Prætorius<sup>1</sup>, Anne Zedeler<sup>1</sup>, Henriette Svarre Nielsen<sup>1,8</sup>, Anja  
14 Pinborg<sup>3,8</sup>, Nina la Cour Freiesleben<sup>1,8</sup>

- 15  
16  
17 1. Department of Obstetrics and Gynaecology  
18 The Fertility Clinic, Hvidovre  
19 Copenhagen University Hospital Hvidovre  
20 Kettegaard Alle 30, DK-2650 Hvidovre, Denmark
- 21  
22  
23 2. Department of Obstetrics and Gynaecology  
24 The Fertility Clinic, Herlev  
25 Copenhagen University Hospital Herlev  
26 Borgmester Ib Juuls Vej 1, DK-2730 Herlev, Denmark
- 27  
28  
29 3. The Fertility Clinic, Rigshospitalet,  
30 Copenhagen University Hospital Rigshospitalet,  
31 Blegdamsvej 9, DK-2100 Copenhagen, Denmark
- 32  
33  
34 4. Department of Obstetrics and Gynaecology  
35 Copenhagen University Hospital North Zealand  
36 Dyrehavevej 29, DK-3400 Hilleroed, Denmark
- 37  
38  
39 5. Department of Obstetrics and Gynaecology  
40 The Fertility Clinic, Koege  
41 Zealand University Hospital Koege  
42 Lykkebaekvej 14, DK-4600 Koege, Denmark
- 43  
44  
45 6. Department of Obstetrics and Gynaecology  
46 The Regional Hospital Horsens  
47 Sundvej 30C, DK-8700 Horsens, Denmark
- 48  
49  
50 7. Department of Clinical Medicine  
51 Aarhus University  
52 Palle Juul-Jensens Boulevard 82, DK-8200 Aarhus N, Denmark
- 53  
54  
55 8. Institute of Clinical Medicine,  
56 Faculty of Health and Medical Sciences
- 57  
58  
59  
60

1 INVICSI: study protocol for a randomised, controlled multicentre trial

2 Version: 4.0

3 Date: March 10, 2021

4  
5 University of Copenhagen,  
6 Blegdamsvej 3B, DK-2200 Copenhagen, Denmark  
7

8  
9 \*Corresponding author; sineberntsen@gmail.com  
10  
11  
12  
13  
14  
15  
16  
17  
18  
19  
20  
21  
22  
23  
24  
25  
26  
27  
28  
29  
30  
31  
32

### 33 **Abstract**

34  
35 Introduction: Over the last decades, the use of intracytoplasmic sperm injection (ICSI) has  
36 increased, even among patients without male factor infertility. The increase has happened despite  
37 the fact that there is no evidence to support that ICSI results in higher live birth rates compared to  
38 conventional in vitro fertilisation (IVF) in cases with non-male factor infertility. The lack of robust  
39 evidence on an advantage of using ICSI over conventional IVF in these patients is problematic  
40 since ICSI is more invasive, complex and requires additional resources, time and effort. Therefore,  
41 the primary objective of the IN Vitro fertilisation versus IntraCytoplasmic Sperm Injection study  
42 (INVICSI) is to determine whether ICSI is superior to standard IVF in patients without severe male  
43 factor infertility. The primary outcome measure is first live birth from fresh and frozen-thawed  
44 transfers after one stimulated cycle.  
45  
46  
47  
48  
49  
50  
51  
52  
53  
54  
55  
56  
57  
58  
59  
60

1 INVICSI: study protocol for a randomised, controlled multicentre trial

2  
3  
4  
5 Methods and analysis: This is a two-armed, multicentre, randomised, controlled trial. Eight hundred  
6  
7 and twenty-four participants with infertility without severe male factor will be recruited and allocated  
8  
9 randomly into two groups (IVF or ICSI) in a 1:1 ratio. Participants will be randomised in variable  
10  
11 block sizes and stratified by trial site and age. The main inclusion criteria are; (i) no prior IVF/ICSI  
12  
13 treatment (ii) male partner sperm with an expected count of minimum 2 million progressive motile  
14  
15 spermatozoa following density gradient purification on the day of oocyte pick-up (OPU) and (iii) age  
16  
17 of the woman between 18 and 42 years.  
18  
19

20  
21  
22 Ethics and dissemination: The study will be performed in accordance with the ethical principles in  
23  
24 the Helsinki Declaration. The study is approved by the Scientific Ethical Committee of the Capital  
25  
26 Region of Denmark and the Danish Knowledge Centre on Data Protection Compliance. Study  
27  
28 findings will be presented, irrespectively of results at international conferences and submitted for  
29  
30 publication in peer-reviewed journals. ClinicalTrials.gov ID: NCT04128904  
31  
32  
33  
34  
35

### 36 **Strengths and limitations of this study**

- 37  
38  
39 • This is a randomised controlled trial with concealment of treatment allocation, stratification  
40  
41 for age and trial site and use of variable block sizes reducing the risk of selection bias and  
42  
43 confounding.  
44
- 45  
46 • The large number of subjects included, and the multicentre approach of the study increases  
47  
48 generalisability of the results.  
49
- 50  
51 • The primary outcome is first live birth episode ensuring maximum clinical impact.  
52
- 53  
54 • Only first cycle patients are included to avoid selection bias based on the knowledge of  
55  
56 results from previous treatment cycles.  
57  
58  
59  
60

INVICSI: study protocol for a randomised, controlled multicentre trial

Version: 4.0

Date: March 10, 2021

- The study is not blinded neither to study participants nor clinicians which could potentially introduce bias.

## Introduction

Since the introduction of ICSI in the early 1990's[1], the use of ICSI has continuously increased and it is now used widely for indications other than male factor infertility. The latest reports from the European Society of Human Reproduction and Embryology (ESHRE) and The International Committee Monitoring Assisted Reproductive Technologies (ICMART) show that in Europe and globally, ICSI is used in around two-thirds of all fresh assisted reproductive technology (ART) cycles[2, 3]. The ICMART report further accentuates the significant disparities that exists in ART practices across countries. An especially high ICSI:IVF ratio is found in the Middle East where the proportion of ICSI cycles in some countries is now 100% of all fresh cycles. It is unlikely that the large disparities between countries can be explained by differences in the prevalence of male factor infertility alone. In the United States (US), a recent study, including data from 2000-2014, showed a substantial increase (52% increase) in the use of ICSI with no corresponding increase in couples treated for male factor infertility[4]. Likewise, another US study found that the largest increase in the use of ICSI between 1996-2012 (from 36% in 1996 to 76% in 2012) was observed among couples without male factor infertility (from 15% to 67%)[5]. The observed increase has happened despite the fact that the use of ICSI for non-male factor infertility remains controversial[6]. While ICSI has resulted in high success rates in couples treated for severe male factor infertility, studies have indicated that ICSI offers no advantage over conventional IVF in non-male factor infertility couples when it comes to live birth rates[7-10]. Moreover, the American Society for Reproductive Medicine (ASRM) recently published a committee opinion stating that 'in cases without male factor infertility or a history of prior fertilisation failure, the routine use of ICSI



1 INVICSI: study protocol for a randomised, controlled multicentre trial

2 Version: 4.0

3 Date: March 10, 2021

4  
5 for all oocytes is not supported by the available evidence'[11]. In the US study from 2018, the large  
6  
7 increase in use of ICSI was correlated with a 7.6%, (P=0.001) increase in live birth rates per cycle  
8  
9 in women younger than 35 years. When including only data from the most recent years (2008-  
10  
11 2014) the correlation between ICSI rates and live birth rates disappeared questioning whether the  
12  
13 ICSI method is responsible for the increased live birth rate [4]. The increased use of ICSI without  
14  
15 the presence of male factor infertility could be attributed to a general belief that ICSI decreases the  
16  
17 risk of fertilisation failure in patients treated for other indications. Indeed, a systematic review and  
18  
19 meta-analysis from 2013 reported higher fertilisation rates and a lower risk of fertilisation failure  
20  
21 after ICSI compared with conventional IVF in sibling oocytes from patients with unexplained  
22  
23 infertility[12]. Yet, many of the included studies did not ascertain their findings with an improvement  
24  
25 in clinical outcome (often due to mixed transfers of embryos from IVF and ICSI). Furthermore,  
26  
27 other studies find no difference in fertilisation rates or comparable rates of fertilisation failure  
28  
29 between the two methods[13-16]. Overall, there is a shortage of randomised controlled trials  
30  
31 (RCTs) comparing ICSI and conventional IVF in patients without male factor infertility and the  
32  
33 generalisability of findings from existing studies is limited[17]. In an RCT, including 415 patients  
34  
35 with non-male factor infertility, comparable pregnancy rates between ICSI and conventional IVF  
36  
37 were observed as well as higher fertilisation rates in the conventional IVF group[15]. Regrettably,  
38  
39 live birth rate was not included as an outcome. A large cohort study, including 745 women aged 40  
40  
41 years or older, reported similar live birth rates after ICSI and conventional IVF as well as similar  
42  
43 rates of fertilisation and fertilisation failure[7]. Likewise, ICSI does not seem to improve  
44  
45 reproductive outcome in women with diminished ovarian reserve (compared to conventional  
46  
47 IVF)[18, 19]. One group that might benefit from ICSI are non-male factor infertility patients with a  
48  
49 history of total fertilisation failure (or low fertilisation)[20].  
50  
51  
52  
53  
54  
55  
56  
57  
58  
59  
60

1 INVICSI: study protocol for a randomised, controlled multicentre trial

2 Version: 4.0

3 Date: March 10, 2021

4  
5 In conclusion, there are still significant gaps in the knowledge regarding ICSI versus conventional  
6 IVF for couples with normal and non-severe male factor infertility. Especially when including  
7 considerations of cost (either for the individual patient or for the public health care system) and  
8 complexity of the methods.  
9

10 The purpose of the INVICSI study is to address this knowledge gap and to infer whether ICSI is  
11 more effective than standard IVF in patients without severe male factor infertility. The primary  
12 outcome measure is first live birth.  
13  
14

## 15 **Methods and analysis**

### 16 **Hypothesis**

17 ICSI is superior to standard IVF for obtaining live birth of a child in fertility patients without severe  
18 male factor infertility.  
19  
20  
21  
22  
23

### 24 **Study design**

25 The INVICSI study is a multicentre, randomised, controlled trial using a parallel arm design to  
26 detect whether ICSI is superior to standard IVF in patients without severe male factor infertility.  
27  
28

29 Patients will be randomised (1:1) to receive insemination of their retrieved eggs with either  
30 standard IVF or ICSI. Trial registration data are displayed in Table 1. Table 2 provides an overview  
31 of revision chronology including current protocol date and version identifier. Protocol modifications  
32 are registered continuously on Clinical Trials.gov. The SPIRIT reporting guidelines were used[21].  
33  
34  
35  
36  
37  
38  
39  
40  
41  
42  
43  
44  
45  
46  
47  
48  
49  
50  
51  
52  
53  
54

### 55 **Setting**

1 INVICSI: study protocol for a randomised, controlled multicentre trial

2  
3  
4  
5 The trial will be conducted in six public fertility clinics in Denmark. All clinics are part of a university  
6  
7 hospital setting and all hospitals perform standardised treatments according to the public health  
8  
9 care system in Denmark. The teams recruiting patients at the trial sites will include fertility doctors,  
10  
11 nursing staff and embryologists. Patient enrolment began in November 2019 and will continue until  
12  
13  
14  
15 December 2023.

### 16 17 18 19 **Eligibility criteria**

20 All couples/women referred for their first fertility treatment at six public fertility clinics in Denmark  
21  
22 are screened for eligibility with the following inclusion and exclusion criteria:  
23  
24  
25

#### 26 27 **Inclusion:**

- 28  
29 a. Written informed consent  
30  
31 b. Age of the woman 18-42 years  
32  
33 c. Male partner with normal or non-severely decreased sperm parameters where the semen  
34  
35 sample (following density gradient purification) on the day of OPU is expected to contain a  
36  
37 minimum of 2 million progressive motile spermatozoa or use of donor sperm  
38  
39  
40  
41 d. Body-mass-index (BMI) of the woman between 18-35 kg/m<sup>2</sup>  
42  
43  
44 e. First fertility treatment due to:  
45  
46 i. Tubal factor  
47  
48 ii. Unexplained infertility  
49  
50  
51 iii. Polycystic ovary syndrome (PCOS)  
52  
53  
54 iv. Light to moderate decreased semen quality in the male partner  
55  
56  
57

#### 58 59 **Exclusion:** 60

1 INVICSI: study protocol for a randomised, controlled multicentre trial

2 Version: 4.0

3 Date: March 10, 2021

- 4
- 5 a. Consent not obtained
- 6
- 7 b. Significant morbidity in the woman:
- 8
- 9
- 10 i. Ovarian cysts >4 cm
- 11
- 12 ii. Known liver or kidney disease
- 13
- 14 iii. Unregulated thyroid disease
- 15
- 16 iv. Endometriosis stage 3-4
- 17
- 18 v. Hypogonadotropic hypogonadism
- 19
- 20 vi. Other severe comorbidity (e.g. diabetes or cardiovascular disease)
- 21
- 22
- 23
- 24 c. Previous IVF or ICSI treatments with current partner
- 25
- 26 d. Use of donor oocytes or frozen oocytes
- 27
- 28
- 29 e. Not speaking or understanding Danish or English language
- 30
- 31
- 32

33 Couples using sperm from the male partner as well as couples (or single women) using donor sperm  
34 are eligible. Subsequently, randomisation and inclusion will be based on data from the female  
35 participant receiving the ovarian stimulation treatment.  
36  
37  
38  
39

40  
41  
42 The study was originally designed and performed with the additional inclusion criteria of regular  
43 menstrual cycles (21-35 days) and a diagnostic sperm sample from the male partner with a minimum  
44 of 5 mill. progressive motile spermatozoa and  $\geq 4\%$  morphologically normal spermatozoa (Table 2).  
45  
46 However, an amendment was added after the inclusion of 28 participants in May 2020. In this  
47 amendment, two of the aforementioned criteria were removed (regular menstrual cycle and minimum  
48 percentage of morphological normal sperm). The criterion for sperm morphology was removed  
49 because the importance of sperm morphology and whether it should be used to predict fertilisation  
50  
51  
52  
53  
54  
55  
56  
57  
58  
59  
60

1 INVICSI: study protocol for a randomised, controlled multicentre trial

2  
3  
4  
5 and reproductive outcome in ART has been questioned [22-26]. The criterion for regular menstrual  
6  
7 cycle was removed as current evidence suggests that women with PCOS have similar chances of  
8  
9 conceiving with fertility treatment compared to women without PCOS[27-29].

10  
11  
12 In September 2019, the criterion for a diagnostic semen sample with a minimum of 5 mill. progressive  
13  
14 motile spermatozoa was also removed (after the inclusion of 88 participants). Due to differences in  
15  
16 laboratory techniques and standard tests performed prior to IVF/ICSI on the trial sites, it was not  
17  
18 feasible to include a criterion for a diagnostic semen sample. The criterion for number of  
19  
20 spermatozoa in the semen sample on the day of OPU remained unchanged.  
21  
22  
23  
24  
25  
26

### 27 **Screening, inclusion and consent**

28  
29 Potentially eligible patients receive verbal and written information about the study by the  
30  
31 investigators during a consultation in the fertility clinic. Inclusion and randomisation of participants  
32  
33 to either ICSI or conventional IVF take place after the ovulation trigger has been prescribed and  
34  
35 before the IVF/ICSI procedure. Couples/women who wish to participate in the trial are asked to  
36  
37 sign an informed consent form prior to enrolment. They will usually have a minimum of two days  
38  
39 between receiving the information and deciding whether they wish to participate in the study or not.  
40  
41  
42 When a patient has given consent and inclusion criteria are met, randomisation is conducted in the  
43  
44 online platform REDCap, which is also used for data collection during the study[30]. The REDCap  
45  
46 database has a complete audit trail and is based on anonymous subject ID numbers. It is not  
47  
48 revealed whether the patient is assigned to standard IVF or ICSI until after the patient has been  
49  
50 recruited and baseline data has been entered in REDCap ensuring treatment allocation  
51  
52 concealment. Participants can withdraw from the trial at any time without giving an explanation,  
53  
54 and their fertility treatment will not be affected.  
55  
56  
57  
58  
59  
60

1 INVICSI: study protocol for a randomised, controlled multicentre trial

2 Version: 4.0

3 Date: March 10, 2021

4  
5  
6  
7 **Randomisation**

8  
9  
10 An independent statistician prepared the computer-generated randomisation scheme in a 1:1 ratio  
11  
12 between the two arms (IVF and ICSI). Permuted blocks of variable size between 4 and 12 were  
13  
14 used for randomisation. The randomisation scheme was stratified by trial site and female age  
15  
16 (three age groups: 18-25 years of age, 26-37 years of age and 38-41 years of age) to ensure that  
17  
18 the number of participants receiving IVF and ICSI is closely balanced within each stratum. The  
19  
20 randomisation procedure is performed online in REDCap. The allocation table was uploaded in  
21  
22 REDCap by the independent statistician and concealed from the clinical staff performing the  
23  
24 randomisation. The unique Danish social security number of each participant is entered initially  
25  
26 ensuring that no participants are randomised twice.  
27  
28  
29  
30  
31  
32  
33

34 **Poor semen sample on the day of OPU**

35  
36 If the semen sample contains less than 2 million progressive spermatozoa in the purified sample  
37  
38 on the day of OPU, the woman/couple will be treated with ICSI regardless of allocation.  
39  
40  
41  
42

43 **Blinding**

44  
45 The study is designed with no blinding of participants, clinicians or assessors. It was decided not to  
46  
47 blind clinicians and participants as our experience shows that patients in the Danish fertility clinics  
48  
49 are eager to know the insemination method used in their treatment. Hence, it was deemed  
50  
51 unrealistic to recruit participants if allocation was only revealed after the endpoints were reached.  
52  
53  
54  
55  
56

57 **Intervention**

1 INVICSI: study protocol for a randomised, controlled multicentre trial

2  
3  
4  
5 The participants will receive conventional IVF or ICSI treatment as determined by randomisation.

6  
7 Both treatments are part of standard treatment regimens at the trial sites.

8  
9 The fertility treatment:

10  
11 The women have been treated in either a short gonadotropin-releasing hormone (GnRH)-  
12 antagonist protocol or a long GnRH-agonist protocol for ovarian stimulation. Both the controlled  
13 ovarian stimulation, transvaginal ultrasound examinations and the ovulation triggering are done  
14 according to the usual daily practice at the trial sites with ovulation trigger prescribed when a  
15 minimum of two to three follicles measure 17 mm or more. Women with only one mature follicle  
16 may also be prescribed the ovulation trigger. OPU is performed  $36\pm 2$  hours after the ovulation  
17 trigger is administered. Oocyte insemination will be IVF or ICSI according to randomisation, using  
18 established procedures at the trial sites. However, short time insemination in the IVF arm is not  
19 allowed. Embryo culture and luteal phase support will follow the usual procedures at each trial site.  
20 Blastocyst transfer is performed on day 5. Patients with a poor ovarian reserve and few oocytes  
21 retrieved ( $\leq 4$ ) are allowed transfer day 2 or 3 according to clinical practice. Single embryo transfers  
22 are planned. Surplus blastocysts of good quality are vitrified on day 5 or 6. Transfer and  
23 cryopreservation are done according to usual practice at each trial site. In cases with total freeze of  
24 all blastocysts due to the risk of ovarian hyperstimulation syndrome (OHSS), women are not  
25 excluded from the trial. In cases where all blastocysts or spare blastocysts are vitrified these are  
26 transferred in subsequent frozen-thawed embryo transfer (FET) cycles according to the daily  
27 practice at each trial site (i.e., natural cycles, substituted or stimulated FET cycles).

28  
29 Urine pregnancy test or a serum pregnancy test is done 11-16 days after embryo transfer. If  
30 pregnancy is achieved, a transvaginal ultrasound scan is performed at pregnancy week 7-9 to  
31 confirm an ongoing and intrauterine pregnancy.  
32  
33  
34  
35  
36  
37  
38  
39  
40  
41  
42  
43  
44  
45  
46  
47  
48  
49  
50  
51  
52  
53  
54  
55  
56  
57  
58  
59  
60

1 INVICSI: study protocol for a randomised, controlled multicentre trial

2 Version: 4.0

3 Date: March 10, 2021

4  
5 Women will be asked to inform the clinic of the result of the pregnancy as is the usual procedure in  
6  
7 the clinic.  
8  
9

## 10 11 12 **Study outcomes**

13  
14  
15 Primary endpoint:

16  
17 The primary endpoint for the INVICSI trial is the first live birth episode following the study cycle in  
18 each of the two groups (IVF and ICSI). This is defined as the first live birth from the oocyte  
19 collection and includes transfer of fresh embryos and frozen-thawed embryos. The minimum  
20 follow-up time will be one year after inclusion. Live birth is defined as the delivery of one or more  
21 living infants  $\geq 22$  weeks gestation. When the primary endpoint is achieved, further live births from  
22 the oocyte collection will not be included in the primary outcome analysis. Subsequent live births  
23 from any FET cycles with embryos from the first fresh cycle are included as a secondary outcome  
24 (all live birth episodes). The secondary outcomes are summarised in Table 3.  
25  
26  
27  
28  
29  
30  
31  
32  
33  
34  
35  
36  
37  
38

## 39 **Data collection methods**

40  
41 Before treatment is initiated all fertility patients in the clinics fill out a standard form including data  
42 on fertility and medical history, ethnicity, medications, smoking, alcohol, height, weight etc. These  
43 data are routinely entered into electronic medical files of the fertility clinics by fertility doctors prior  
44 to the patients first consultation in the clinic. This is part of standard practice for all fertility patients.  
45  
46 For the INVICSI study, baseline data will be gathered by the investigators from the electronic files  
47 after written informed consent has been given (age, weight, height, ethnicity, antral follicle count  
48 (AFC), anti-müllerian hormone (AMH) concentration, years of infertility, primary or secondary  
49 infertility, infertility diagnosis, stimulation protocol, sperm characteristics). Data will then be entered  
50  
51  
52  
53  
54  
55  
56  
57  
58  
59  
60



1 INVICSI: study protocol for a randomised, controlled multicentre trial

2  
3  
4 into REDCap after which the randomisation and allocation to either standard IVF or ICSI will occur.

5  
6 Data on treatment outcome including fertilisation, embryo development, pregnancy and pregnancy  
7  
8 loss (secondary outcomes, Table 3) will be collected and entered in REDCap. The couple/woman  
9  
10 is asked to consent to data being obtained from the child's file in case the fertility treatment results  
11  
12 in the birth of a living child.  
13  
14

15  
16 To ensure data collection, an investigator will follow-up on all participants that obtains pregnancy.

17  
18 Follow-up will take place one year after the ultrasound scan (week 7-9). If the participant has  
19  
20 informed the fertility clinic on birth and child, an investigator will contact the participant via a phone  
21  
22 call or retrieve all information from the electronic patient record.  
23  
24  
25  
26  
27  
28

### 29 **Statistical considerations**

30  
31 Proposed sample size:

32  
33 The rate of first live births after transfer of up to all of the transferable embryos from the first OPU is  
34  
35 set to 45% in the conventional IVF group and 55 % in the ICSI group. This is a superiority trial with  
36  
37 a power of 80% and a 2-sided p-value of 5%. The sample size is estimated to be 392 patients in  
38  
39 each group. Post-randomization exclusion is expected to be 5%, resulting in a total of 824 patients.  
40  
41  
42

43 Data analysis:

44  
45 ITT analysis and per-protocol analysis will be performed. Baseline characteristics and outcomes  
46  
47 will be compared using t-test, Mann-Whitney U test or chi-square tests for continuous and  
48  
49 categorical variables or logistic regression analysis, controlling for possible confounding effects  
50  
51 where appropriate. P-values of <0.05 will be considered statistically significant. Statistical analyses  
52  
53 will be performed by an investigator together with statistical experts. The primary RCT analysis will  
54  
55 be performed by an independent statistician blinded to group allocation.  
56  
57  
58  
59  
60

1 INVICSI: study protocol for a randomised, controlled multicentre trial

2 Version: 4.0

3 Date: March 10, 2021

4  
5  
6  
7 **Patient and Public Involvement**

8  
9  
10 There has been no patient or public involvement in the development of study design, recruitment or  
11  
12 research question.  
13

14  
15  
16  
17 **Ethics and dissemination**

18  
19 **Data security and ethical aspects**

20  
21  
22 Data to describe the study population and the outcomes will be collected in a single database  
23  
24 including all participants with an identification code, which makes every participant anonymous in  
25  
26 the database.  
27

28  
29 The study is approved by the Scientific Ethical Committee of the Capital Region of Denmark (H-  
30  
31 19022201) and the Danish Knowledge Centre on Data Protection Compliance. The study will be  
32  
33 performed according to the Danish Law and Ethical principles in the Helsinki Declaration. Each  
34  
35 participant will receive oral and written information about the study and will have opportunity for  
36  
37 time and reflection. They can also discuss their participation with a third person. The collected  
38  
39 oocytes of the participants will be fertilised with IVF or ICSI according to randomisation. Some  
40  
41 couples/women may experience no fertilisation after either IVF or ICSI in the study. This risk is not  
42  
43 considered significantly higher compared to women who do not participate in the study. The study  
44  
45 is registered with the National Institute of Health's ClinicalTrials.gov (NCT04128904).  
46  
47  
48  
49  
50

51  
52  
53 **Dissemination**

54  
55 The findings of the study will be presented at national and international fertility conferences, such  
56  
57 as the European Society of Human Reproduction and Embryology (ESHRE) annual meeting. In  
58  
59  
60

1 INVICSI: study protocol for a randomised, controlled multicentre trial

2  
3  
4  
5 addition, the findings will be published in peer reviewed scientific journals. Public dissemination will  
6  
7 be in the lay press.  
8  
9

## 10 11 12 **Data-sharing**

13  
14 Data from the trial will be shared according to the ICJME guidelines. On request, data can be  
15  
16 shared with parties presenting relevant aims for the use of data. Purposes and financial aspects of  
17  
18 the other party must be approved by the steering committee of the “INVICSI” research team. No  
19  
20 data will be shared until three months after the publication of papers reporting the primary and  
21  
22 secondary outcomes of the trial. Any new research project must be approved by Danish  
23  
24 authorities. The requesting party cover the costs for data sharing.  
25  
26  
27  
28  
29  
30

## 31 **Discussion**

32  
33 Worldwide, the rate of treatment cycles where oocytes are fertilised with ICSI is increasing, also in  
34  
35 patients without severe male factor infertility. Currently there is no evidence to support that ICSI  
36  
37 results in a higher live birth rate compared to standard IVF in these patients. If the INVICSI study  
38  
39 finds that ICSI is superior to standard IVF in cases without severe male factor infertility, the  
40  
41 increasing use of ICSI is justified and may then be recommended. However, if the INVICSI study  
42  
43 fails to show superiority of ICSI, standard IVF should be recommended as the preferred first choice  
44  
45 method of fertilisation in patients without severe male factor infertility. This could potentially lead to  
46  
47 significant cost savings and a higher use of standard IVF which is less invasive, closer to natural  
48  
49 fertilisation and less expensive.  
50  
51  
52  
53  
54  
55  
56  
57

## 58 **Authors' contributions:**

1 INVICSI: study protocol for a randomised, controlled multicentre trial

2 Version: 4.0

3 Date: March 10, 2021

4  
5 SB and NCF were responsible for the conception, design and execution of the study protocol. SB,  
6  
7 NCF and AP contributed to the initial revision and editing of the manuscript. AZ was consulted  
8  
9 concerning the laboratory details of the study design. SB, NCF, AP, AZ, ALME, UBK, MRP, LFA,  
10  
11 BN, HSN, LP, and MLG contributed to the critical revision of the manuscript as well as the approval  
12  
13 of the final version for submission in BMJ Open.  
14  
15

### 16 17 18 19 20 **Funding:**

21  
22 The study is funded by a research grant from the Capital Region of Denmark (grant number  
23  
24 A6606) and by two unrestricted grants from Gedeon Richter (grant number is not applicable).

25  
26 Gedeon Richter and the Capital Region of Denmark had no role in the design of the study and will  
27  
28 not have any role during the execution, analysis, interpretation of the data, or decision to submit  
29  
30 results.  
31  
32

### 33 34 35 36 **Competing interests:**

37  
38 SB and NCF received a research grant from the Capital Region of Denmark and two unrestricted  
39  
40 grants from Gedeon Richter to support the INVICSI study as mentioned under 'Funding'. Outside  
41  
42 the submitted work authors have received grants/fees/funding or declare relationships with the  
43  
44 following third parties:  
45  
46

47  
48 SB: Gedeon Richter, the Capitol Region of Denmark. NCF: Gedeon Richter, Ferring  
49  
50 Pharmaceuticals, Merck A/S, Head of the steering committee for the Danish Fertility Guidelines  
51  
52 made by members of the Danish Fertility Society (no payment), Guerbet, Advisory Board (personal  
53  
54 fee). AP: Gedeon Richter, Ferring Pharmaceuticals, Merck A/S, Theramex. UBK: IBSA, Ferring  
55  
56 Pharmaceuticals, Merck A/S. LFA: Gedeon Richter. BN: Gedeon Richter, IBSA, Merck A/S. HSN:  
57  
58  
59  
60

1  
2  
3  
4  
5  
6  
7  
8  
9  
10  
11  
12  
13  
14  
15  
16  
17  
18  
19  
20  
21  
22  
23  
24  
25  
26  
27  
28  
29  
30  
31  
32  
33  
34  
35  
36  
37  
38  
39  
40  
41  
42  
43  
44  
45  
46  
47  
48  
49  
50  
51  
52  
53  
54  
55  
56  
57  
58  
59  
60

INVICSI: study protocol for a randomised, controlled multicentre trial

Version: 4.0

Date: March 10, 2021

Ferring Pharmaceuticals, Merck A/S, AstraZeneca, Cook Medical, Freya Biosciences ApS, Ferring  
Pharmaceuticals, BioInnovation Institute, Danish Ministry of Education. MLG: Gedeon Richter,  
Merck A/S. LP: Gedeon Richter, Merck A/S.

The authors do not report any potential conflict of interest.

For peer review only

#### References:

1. Palermo G, Joris H, Devroey P, et al. Pregnancies after intracytoplasmic injection of single spermatozoon into an oocyte. *Lancet*. 1992;340(8810):17-8.
2. De Geyter C, Calhaz-Jorge C, Kupka MS, et al. ART in Europe, 2015: results generated from European registries by ESHRE. *Hum Reprod Open*. 2020;2020(1):hoz038.

INVICSI: study protocol for a randomised, controlled multicentre trial

Version: 4.0

Date: March 10, 2021

3. de Mouzon J, Chambers GM, Zegers-Hochschild F, et al. International Committee for Monitoring Assisted Reproductive Technologies world report: assisted reproductive technology 2012. *Hum Reprod*. 2020;35(8):1900-13.
4. Zagadailov P, Hsu A, Stern JE, et al. Temporal Differences in Utilization of Intracytoplasmic Sperm Injection Among U.S. Regions. *Obstet Gynecol*. 2018;132(2):310-20.
5. Boulet SL, Mehta A, Kissin DM, et al. Trends in use of and reproductive outcomes associated with intracytoplasmic sperm injection. *JAMA*. 2015;313(3):255-63.
6. Evers JL. Santa Claus in the fertility clinic. *Hum Reprod*. 2016;31(7):1381-2.
7. Tannus S, Son WY, Gilman A, et al. The role of intracytoplasmic sperm injection in non-male factor infertility in advanced maternal age. *Hum Reprod*. 2017;32(1):119-24.
8. Gennarelli G, Carosso A, Canosa S, et al. ICSI Versus Conventional IVF in Women Aged 40 Years or More and Unexplained Infertility: A Retrospective Evaluation of 685 Cycles with Propensity Score Model. *J Clin Med*. 2019;8(10).
9. Sfontouris IA, Kolibianakis EM, Lainas GT, et al. Live birth rates using conventional in vitro fertilization compared to intracytoplasmic sperm injection in Bologna poor responders with a single oocyte retrieved. *J Assist Reprod Genet*. 2015;32(5):691-7.
10. Li Z, Wang AY, Bowman M, et al. ICSI does not increase the cumulative live birth rate in non-male factor infertility. *Hum Reprod*. 2018;33(7):1322-30.
11. Practice Committees of the American Society for Reproductive M, the Society for Assisted Reproductive Technology. Electronic address aao. Intracytoplasmic sperm injection (ICSI) for non-male factor indications: a committee opinion. *Fertil Steril*. 2020;114(2):239-45.
12. Johnson LN, Sasson IE, Sammel MD, et al. Does intracytoplasmic sperm injection improve the fertilization rate and decrease the total fertilization failure rate in couples with well-defined unexplained infertility? A systematic review and meta-analysis. *Fertil Steril*. 2013;100(3):704-11.
13. Vitek WS, Galarraga O, Klatsky PC, et al. Management of the first in vitro fertilization cycle for unexplained infertility: a cost-effectiveness analysis of split in vitro fertilization-intracytoplasmic sperm injection. *Fertil Steril*. 2013;100(5):1381-8.
14. Kim HH, Bundorf MK, Behr B, et al. Use and outcomes of intracytoplasmic sperm injection for non-male factor infertility. *Fertil Steril*. 2007;88(3):622-8.
15. Bhattacharya S, Hamilton MP, Shaaban M, et al. Conventional in-vitro fertilisation versus intracytoplasmic sperm injection for the treatment of non-male-factor infertility: a randomised controlled trial. *Lancet*. 2001;357(9274):2075-9.
16. Ruiz A, Remohi J, Minguez Y, et al. The role of in vitro fertilization and intracytoplasmic sperm injection in couples with unexplained infertility after failed intrauterine insemination. *Fertil Steril*. 1997;68(1):171-3.
17. van Rumste MM, Evers JL, Farquhar CM. Intra-cytoplasmic sperm injection versus conventional techniques for oocyte insemination during in vitro fertilisation in patients with non-male subfertility. *Cochrane Database Syst Rev*. 2003(2):CD001301.
18. Butts SF, Owen C, Mainigi M, et al. Assisted hatching and intracytoplasmic sperm injection are not associated with improved outcomes in assisted reproduction cycles for diminished ovarian reserve: an analysis of cycles in the United States from 2004 to 2011. *Fertil Steril*. 2014;102(4):1041-7 e1.
19. Luna M, Bigelow C, Duke M, et al. Should ICSI be recommended routinely in patients with four or fewer oocytes retrieved? *J Assist Reprod Genet*. 2011;28(10):911-5.
20. van der Westerlaken L, Helmerhorst F, Dieben S, et al. Intracytoplasmic sperm injection as a treatment for unexplained total fertilization failure or low fertilization after conventional in vitro fertilization. *Fertil Steril*. 2005;83(3):612-7.
21. Chan AW, Tetzlaff JM, Gotzsche PC, et al. SPIRIT 2013 explanation and elaboration: guidance for protocols of clinical trials. *BMJ*. 2013;346:e7586.

1 INVICSI: study protocol for a randomised, controlled multicentre trial

2 Version: 4.0

3 Date: March 10, 2021

- 4
- 5 22. Kohn TP, Kohn JR, Ramasamy R. Effect of Sperm Morphology on Pregnancy Success via  
6 Intrauterine Insemination: A Systematic Review and Meta-Analysis. *J Urol*. 2018;199(3):812-22.
- 7 23. Kohn TP, Kohn JR, Lamb DJ. Role of Sperm Morphology in Deciding Between Various Assisted  
8 Reproduction Technologies. *Eur Urol Focus*. 2018;4(3):311-3.
- 9 24. Lemmens L, Kos S, Beijer C, et al. Predictive value of sperm morphology and progressively  
10 motile sperm count for pregnancy outcomes in intrauterine insemination. *Fertil Steril*. 2016;105(6):1462-8.
- 11 25. Deveneau NE, Sinno O, Krause M, et al. Impact of sperm morphology on the likelihood of  
12 pregnancy after intrauterine insemination. *Fertil Steril*. 2014;102(6):1584-90 e2.
- 13 26. Hotaling JM, Smith JF, Rosen M, et al. The relationship between isolated teratozoospermia  
14 and clinical pregnancy after in vitro fertilization with or without intracytoplasmic sperm injection: a  
15 systematic review and meta-analysis. *Fertil Steril*. 2011;95(3):1141-5.
- 16 27. Sha T, Wang X, Cheng W, et al. A meta-analysis of pregnancy-related outcomes and  
17 complications in women with polycystic ovary syndrome undergoing IVF. *Reprod Biomed Online*.  
18 2019;39(2):281-93.
- 19 28. Sigala J, Sifer C, Dewailly D, et al. Is polycystic ovarian morphology related to a poor oocyte  
20 quality after controlled ovarian hyperstimulation for intracytoplasmic sperm injection? Results from a  
21 prospective, comparative study. *Fertil Steril*. 2015;103(1):112-8.
- 22 29. Heijnen EM, Eijkemans MJ, Hughes EG, et al. A meta-analysis of outcomes of conventional  
23 IVF in women with polycystic ovary syndrome. *Hum Reprod Update*. 2006;12(1):13-21.
- 24 30. Harris PA, Taylor R, Thielke R, et al. Research electronic data capture (REDCap)--a metadata-  
25 driven methodology and workflow process for providing translational research informatics support. *J*  
26 *Biomed Inform*. 2009;42(2):377-81.
- 27  
28  
29  
30  
31  
32  
33  
34  
35  
36  
37  
38  
39  
40  
41  
42  
43  
44  
45  
46  
47  
48  
49  
50  
51  
52  
53  
54  
55  
56  
57  
58  
59  
60

INVICSI: study protocol for a randomised, controlled multicentre trial

Version: 4.0

Date: March 10, 2021

**Table 1. Trial registration data**

| Data category                                 | Information                                                                                                                                                                                                                                                                                                                                                                                                                                                                                                   |
|-----------------------------------------------|---------------------------------------------------------------------------------------------------------------------------------------------------------------------------------------------------------------------------------------------------------------------------------------------------------------------------------------------------------------------------------------------------------------------------------------------------------------------------------------------------------------|
| Primary registry and trial identifying number | ClinicalTrials.gov ID: NCT04128904, Protocol ID: INVICSI2019                                                                                                                                                                                                                                                                                                                                                                                                                                                  |
| Date of registration in primary registry      | July 10, 2019                                                                                                                                                                                                                                                                                                                                                                                                                                                                                                 |
| Secondary identifying numbers                 | H-19022201                                                                                                                                                                                                                                                                                                                                                                                                                                                                                                    |
| Source(s) of monetary or material support     | Capital Region of Denmark<br>Gedeon Richter                                                                                                                                                                                                                                                                                                                                                                                                                                                                   |
| Primary sponsor                               | Copenhagen University Hospital Hvidovre                                                                                                                                                                                                                                                                                                                                                                                                                                                                       |
| Secondary sponsor(s)                          | None                                                                                                                                                                                                                                                                                                                                                                                                                                                                                                          |
| Contact for public queries                    | SB ( <a href="mailto:sineberntsen@gmail.com">sineberntsen@gmail.com</a> )                                                                                                                                                                                                                                                                                                                                                                                                                                     |
| Contact for scientific queries                | SB, NCF<br>Department of Obstetrics and Gynaecology<br>The Fertility Clinic, Hvidovre<br>Copenhagen University Hospital Hvidovre                                                                                                                                                                                                                                                                                                                                                                              |
| Public title                                  | INVICSI – IVF versus ICSI in patients without severe male factor infertility                                                                                                                                                                                                                                                                                                                                                                                                                                  |
| Scientific title                              | In vitro fertilisation (IVF) versus intracytoplasmic sperm injection (ICSI) in patients without severe male factor infertility (INVICSI): a randomised, controlled, multicentre trial                                                                                                                                                                                                                                                                                                                         |
| Countries of recruitment                      | Denmark                                                                                                                                                                                                                                                                                                                                                                                                                                                                                                       |
| Health condition(s) or problem(s) studied     | Methods of insemination (ICSI vs. conventional IVF), Infertility without severe male factor                                                                                                                                                                                                                                                                                                                                                                                                                   |
| Intervention(s)                               | Active comparator: Insemination with ICSI<br>Active comparator: Insemination with conventional IVF                                                                                                                                                                                                                                                                                                                                                                                                            |
| Key inclusion and exclusion criteria          | Inclusion: Age of the woman 18-42 years, BMI of the woman between 18-35 kg/m <sup>2</sup> , Male partner with normal or non-severely decreased sperm parameters or use of donor sperm<br>Exclusion: Previous IVF or ICSI treatments with current partner, Use of donor oocytes or frozen oocytes, Ovarian cysts >4 cm, Known liver or kidney disease, Unregulated thyroid disease, Endometriosis stage 3-4, Hypogonadotropic hypogonadism, Other severe comorbidity (e.g. diabetes or cardiovascular disease) |
| Study type                                    | Randomised controlled multicenter trial using a parallel arm design. Randomisation 1:1 to receive insemination with ICSI or conventional IVF                                                                                                                                                                                                                                                                                                                                                                  |
| Date of first enrolment                       | November 29, 2019                                                                                                                                                                                                                                                                                                                                                                                                                                                                                             |
| Target sample size                            | 824                                                                                                                                                                                                                                                                                                                                                                                                                                                                                                           |
| Recruitment status                            | Recruiting                                                                                                                                                                                                                                                                                                                                                                                                                                                                                                    |



INVICSI: study protocol for a randomised, controlled multicentre trial

Version: 4.0

Date: March 10, 2021

|                        |                                                                                                                                                                                                                                          |
|------------------------|------------------------------------------------------------------------------------------------------------------------------------------------------------------------------------------------------------------------------------------|
| Primary outcome(s)     | First live birth rate: the number of first live birth episodes from the study oocyte collections including transfer of fresh- and frozen-thawed embryos                                                                                  |
| Key secondary outcomes | Cycles with total fertilisation failure, fertilisation rate, embryo quality, positive pregnancy test rate, ongoing pregnancy rate, pregnancy loss rate, all live birth episodes, preterm delivery, birth weight and congenital anomalies |

**Table 2. Protocol, Revision chronology**

| Version     | Date of approval  | Primary reasons for amendment                                                                                                                                                                                                                  |
|-------------|-------------------|------------------------------------------------------------------------------------------------------------------------------------------------------------------------------------------------------------------------------------------------|
| Original    | August 8, 2019    |                                                                                                                                                                                                                                                |
| Amendment 1 | January 28, 2020  | New trial site added (The Fertility Clinic, Regional Hospital Horsens)                                                                                                                                                                         |
| Amendment 2 | March 20, 2020    | Removed inclusion criteria: (i) Regular menstrual cycles (21-35 days). (ii) Diagnostic sperm sample from the male partner with $\geq 4\%$ morphologically normal spermatozoa<br>Added section: Handling of poor semen sample on the day of OPU |
| Amendment 3 | September 2, 2020 | New trial site added (The Fertility Clinic, Zealand University Hospital)                                                                                                                                                                       |

INVICSI: study protocol for a randomised, controlled multicentre trial

Version: 4.0

Date: March 10, 2021

|                                          |                           |                                                                                                                                                                                                                                                                                                                                                                                                                                                                 |
|------------------------------------------|---------------------------|-----------------------------------------------------------------------------------------------------------------------------------------------------------------------------------------------------------------------------------------------------------------------------------------------------------------------------------------------------------------------------------------------------------------------------------------------------------------|
| <p>Amendment 4<br/>(Current version)</p> | <p>September 16, 2020</p> | <p>Removed inclusion criteria:<br/>Treatment with donor sperm or male partner sperm with a minimum concentration of 5 million progressive motile spermatozoa in a (purified) <i>diagnostic</i> semen sample.</p> <p>Added inclusion criteria:<br/>Male partner with normal or non-severely decreased sperm parameters where the sperm sample (purified) on the day of oocyte pick up is expected to contain a minimum of 2 million progressive spermatozoa.</p> |
|------------------------------------------|---------------------------|-----------------------------------------------------------------------------------------------------------------------------------------------------------------------------------------------------------------------------------------------------------------------------------------------------------------------------------------------------------------------------------------------------------------------------------------------------------------|

For peer review only

1  
2  
3  
4  
5  
6  
7  
8  
9  
10  
11  
12  
13  
14  
15  
16  
17  
18  
19  
20  
21  
22  
23  
24  
25  
26  
27  
28  
29  
30  
31  
32  
33  
34  
35  
36  
37  
38  
39  
40  
41  
42  
43  
44  
45  
46  
47  
48  
49  
50  
51  
52  
53  
54  
55  
56  
57  
58  
59  
60

INVICSI: study protocol for a randomised, controlled multicentre trial

Version: 4.0

Date: March 10, 2021

**Table 3. Secondary outcomes**

| Outcome       | Assessment                                                                                                                           |
|---------------|--------------------------------------------------------------------------------------------------------------------------------------|
| Fertilisation | <b>Fertilisation rate</b> per aspirated oocyte retrieved (16-20 hours after IVF/ICSI) defined as the appearance of 2 pronuclei (PN). |
|               | Cycles with total <b>fertilisation failure</b> .                                                                                     |
| Embryo data   | <b>Embryo quality</b> (i.e. good quality blastocysts according to Gardner classification).                                           |
|               | <b>Embryo time-lapse kinetics</b> including cleavage patterns.                                                                       |
|               | <b>Embryo utilisation rate</b> (number of transferred + cryopreserved embryos per number of 2 PN zygotes).                           |
| Freeze        | Number of <b>frozen blastocysts</b> (time frame: up to six days after oocyte pick-up (OPU)).                                         |
| Pregnancy     | <b>Positive pregnancy test</b> (positive urine or serum hCG 11-21 days after embryo transfer).                                       |
|               | <b>Multiple pregnancy</b> (period: up to 12 weeks after embryo transfer).<br>Number of intrauterine gestations.                      |
|               | <b>Ongoing pregnancy</b> per transfer (fetal heartbeat on ultrasound in gestational week 7-8).                                       |
| Miscarriage   | <b>Pregnancy loss rate</b> (period: up to 12 weeks after embryo transfer).                                                           |

INVICSI: study protocol for a randomised, controlled multicentre trial

Version: 4.0

Date: March 10, 2021

|                               |                                                                                                                                                                      |
|-------------------------------|----------------------------------------------------------------------------------------------------------------------------------------------------------------------|
|                               |                                                                                                                                                                      |
|                               | <p><b>Biochemical pregnancies</b> (positive urine or serum hCG 11-21 days after embryo transfer without any clinical signs of intra- or extrauterine pregnancy).</p> |
|                               | <p><b>Ectopic pregnancy/pregnancy of unknown location (PUL)</b></p>                                                                                                  |
| <p><b>Birth/offspring</b></p> | <p><b>All live birth episodes</b> (all live births from the study oocyte collection (including second and further live births)</p>                                   |
|                               | <p><b>Preterm delivery</b> (delivery at gestational week 22-36+6).</p>                                                                                               |
|                               | <p><b>Birth weight/weight for gestational age.</b></p>                                                                                                               |
|                               | <p><b>Congenital anomaly</b> diagnosed at birth.</p>                                                                                                                 |

**Birth/offspring**

# Reporting checklist for protocol of a clinical trial.

Based on the SPIRIT guidelines.

## Instructions to authors

Complete this checklist by entering the page numbers from your manuscript where readers will find each of the items listed below.

Your article may not currently address all the items on the checklist. Please modify your text to include the missing information. If you are certain that an item does not apply, please write "n/a" and provide a short explanation.

Upload your completed checklist as an extra file when you submit to a journal.

In your methods section, say that you used the SPIRIT reporting guidelines, and cite them as:

Chan A-W, Tetzlaff JM, Gøtzsche PC, Altman DG, Mann H, Berlin J, Dickersin K, Hróbjartsson A, Schulz KF, Parulekar WR, Krleža-Jerić K, Laupacis A, Moher D. SPIRIT 2013 Explanation and Elaboration: Guidance for protocols of clinical trials. *BMJ*. 2013;346:e7586

|                                   |                     |                                                                                                              | Page   |
|-----------------------------------|---------------------|--------------------------------------------------------------------------------------------------------------|--------|
|                                   |                     | Reporting Item                                                                                               | Number |
| <b>Administrative information</b> |                     |                                                                                                              |        |
| Title                             | <a href="#">#1</a>  | Descriptive title identifying the study design, population, interventions, and, if applicable, trial acronym | 1      |
| Trial registration                | <a href="#">#2a</a> | Trial identifier and registry name. If not yet registered,                                                   | 2      |

|    |                          |                                                                                  |       |
|----|--------------------------|----------------------------------------------------------------------------------|-------|
| 1  |                          | name of intended registry                                                        |       |
| 2  |                          |                                                                                  |       |
| 3  |                          |                                                                                  |       |
| 4  | Trial registration: data | <a href="#">#2b</a> All items from the World Health Organization Trial           | 14    |
| 5  |                          |                                                                                  |       |
| 6  | set                      | Registration Data Set                                                            |       |
| 7  |                          |                                                                                  |       |
| 8  |                          |                                                                                  |       |
| 9  | Protocol version         | <a href="#">#3</a> Date and version identifier                                   | 15    |
| 10 |                          |                                                                                  |       |
| 11 |                          |                                                                                  |       |
| 12 | Funding                  | <a href="#">#4</a> Sources and types of financial, material, and other support   | 11    |
| 13 |                          |                                                                                  |       |
| 14 |                          |                                                                                  |       |
| 15 | Roles and                | <a href="#">#5a</a> Names, affiliations, and roles of protocol contributors      | 1, 10 |
| 16 |                          |                                                                                  |       |
| 17 | responsibilities:        |                                                                                  |       |
| 18 |                          |                                                                                  |       |
| 19 | contributorship          |                                                                                  |       |
| 20 |                          |                                                                                  |       |
| 21 |                          |                                                                                  |       |
| 22 |                          |                                                                                  |       |
| 23 | Roles and                | <a href="#">#5b</a> Name and contact information for the trial sponsor           | 14    |
| 24 |                          |                                                                                  |       |
| 25 | responsibilities:        |                                                                                  |       |
| 26 |                          |                                                                                  |       |
| 27 | sponsor contact          |                                                                                  |       |
| 28 |                          |                                                                                  |       |
| 29 | information              |                                                                                  |       |
| 30 |                          |                                                                                  |       |
| 31 |                          |                                                                                  |       |
| 32 |                          |                                                                                  |       |
| 33 | Roles and                | <a href="#">#5c</a> Role of study sponsor and funders, if any, in study design;  | 11    |
| 34 |                          |                                                                                  |       |
| 35 | responsibilities:        | collection, management, analysis, and interpretation of                          |       |
| 36 |                          |                                                                                  |       |
| 37 | sponsor and funder       | data; writing of the report; and the decision to submit the                      |       |
| 38 |                          |                                                                                  |       |
| 39 |                          | report for publication, including whether they will have                         |       |
| 40 |                          |                                                                                  |       |
| 41 |                          | ultimate authority over any of these activities                                  |       |
| 42 |                          |                                                                                  |       |
| 43 |                          |                                                                                  |       |
| 44 |                          |                                                                                  |       |
| 45 | Roles and                | <a href="#">#5d</a> Composition, roles, and responsibilities of the coordinating | n/a   |
| 46 |                          |                                                                                  |       |
| 47 | responsibilities:        | centre, steering committee, endpoint adjudication                                |       |
| 48 |                          |                                                                                  |       |
| 49 | committees               | committee, data management team, and other individuals                           |       |
| 50 |                          |                                                                                  |       |
| 51 |                          | or groups overseeing the trial, if applicable (see Item 21a                      |       |
| 52 |                          |                                                                                  |       |
| 53 |                          | for data monitoring committee)                                                   |       |
| 54 |                          |                                                                                  |       |
| 55 |                          |                                                                                  |       |
| 56 |                          |                                                                                  |       |
| 57 | <b>Introduction</b>      |                                                                                  |       |
| 58 |                          |                                                                                  |       |
| 59 |                          |                                                                                  |       |
| 60 |                          |                                                                                  |       |

|    |                           |                     |                                                                   |     |
|----|---------------------------|---------------------|-------------------------------------------------------------------|-----|
| 1  | Background and            | <a href="#">#6a</a> | Description of research question and justification for            | 2-4 |
| 2  |                           |                     |                                                                   |     |
| 3  | rationale                 |                     | undertaking the trial, including summary of relevant studies      |     |
| 4  |                           |                     | (published and unpublished) examining benefits and harms          |     |
| 5  |                           |                     | for each intervention                                             |     |
| 6  |                           |                     |                                                                   |     |
| 7  |                           |                     |                                                                   |     |
| 8  |                           |                     |                                                                   |     |
| 9  |                           |                     |                                                                   |     |
| 10 |                           |                     |                                                                   |     |
| 11 | Background and            | <a href="#">#6b</a> | Explanation for choice of comparators                             | 2-4 |
| 12 |                           |                     |                                                                   |     |
| 13 | rationale: choice of      |                     |                                                                   |     |
| 14 |                           |                     |                                                                   |     |
| 15 | comparators               |                     |                                                                   |     |
| 16 |                           |                     |                                                                   |     |
| 17 |                           |                     |                                                                   |     |
| 18 | Objectives                | <a href="#">#7</a>  | Specific objectives or hypotheses                                 | 4   |
| 19 |                           |                     |                                                                   |     |
| 20 |                           |                     |                                                                   |     |
| 21 |                           |                     |                                                                   |     |
| 22 | Trial design              | <a href="#">#8</a>  | Description of trial design including type of trial (eg, parallel | 4   |
| 23 |                           |                     | group, crossover, factorial, single group), allocation ratio,     |     |
| 24 |                           |                     | and framework (eg, superiority, equivalence, non-inferiority,     |     |
| 25 |                           |                     | exploratory)                                                      |     |
| 26 |                           |                     |                                                                   |     |
| 27 |                           |                     |                                                                   |     |
| 28 |                           |                     |                                                                   |     |
| 29 |                           |                     |                                                                   |     |
| 30 |                           |                     |                                                                   |     |
| 31 | <b>Methods:</b>           |                     |                                                                   |     |
| 32 |                           |                     |                                                                   |     |
| 33 | <b>Participants,</b>      |                     |                                                                   |     |
| 34 |                           |                     |                                                                   |     |
| 35 | <b>interventions, and</b> |                     |                                                                   |     |
| 36 |                           |                     |                                                                   |     |
| 37 | <b>outcomes</b>           |                     |                                                                   |     |
| 38 |                           |                     |                                                                   |     |
| 39 |                           |                     |                                                                   |     |
| 40 |                           |                     |                                                                   |     |
| 41 | Study setting             | <a href="#">#9</a>  | Description of study settings (eg, community clinic,              | 4   |
| 42 |                           |                     | academic hospital) and list of countries where data will be       |     |
| 43 |                           |                     | collected. Reference to where list of study sites can be          |     |
| 44 |                           |                     | obtained                                                          |     |
| 45 |                           |                     |                                                                   |     |
| 46 |                           |                     |                                                                   |     |
| 47 |                           |                     |                                                                   |     |
| 48 |                           |                     |                                                                   |     |
| 49 |                           |                     |                                                                   |     |
| 50 |                           |                     |                                                                   |     |
| 51 | Eligibility criteria      | <a href="#">#10</a> | Inclusion and exclusion criteria for participants. If             | 4-5 |
| 52 |                           |                     | applicable, eligibility criteria for study centres and            |     |
| 53 |                           |                     | individuals who will perform the interventions (eg,               |     |
| 54 |                           |                     |                                                                   |     |
| 55 |                           |                     |                                                                   |     |
| 56 |                           |                     |                                                                   |     |
| 57 |                           |                     |                                                                   |     |
| 58 |                           |                     |                                                                   |     |
| 59 |                           |                     |                                                                   |     |
| 60 |                           |                     |                                                                   |     |

|    |                      |                                                                                   |      |
|----|----------------------|-----------------------------------------------------------------------------------|------|
|    |                      | surgeons, psychotherapists)                                                       |      |
| 1  |                      |                                                                                   |      |
| 2  |                      |                                                                                   |      |
| 3  |                      |                                                                                   |      |
| 4  | Interventions:       | <a href="#">#11a</a> Interventions for each group with sufficient detail to allow | 7-8  |
| 5  |                      |                                                                                   |      |
| 6  | description          | replication, including how and when they will be                                  |      |
| 7  |                      |                                                                                   |      |
| 8  |                      | administered                                                                      |      |
| 9  |                      |                                                                                   |      |
| 10 |                      |                                                                                   |      |
| 11 | Interventions:       | <a href="#">#11b</a> Criteria for discontinuing or modifying allocated            | 7    |
| 12 |                      |                                                                                   |      |
| 13 | modifications        | interventions for a given trial participant (eg, drug dose                        |      |
| 14 |                      |                                                                                   |      |
| 15 |                      | change in response to harms, participant request, or                              |      |
| 16 |                      |                                                                                   |      |
| 17 |                      | improving / worsening disease)                                                    |      |
| 18 |                      |                                                                                   |      |
| 19 |                      |                                                                                   |      |
| 20 |                      |                                                                                   |      |
| 21 | Interventions:       | <a href="#">#11c</a> Strategies to improve adherence to intervention protocols,   | n/a  |
| 22 |                      |                                                                                   |      |
| 23 | adherence            | and any procedures for monitoring adherence (eg, drug                             |      |
| 24 |                      |                                                                                   |      |
| 25 |                      | tablet return; laboratory tests)                                                  |      |
| 26 |                      |                                                                                   |      |
| 27 |                      |                                                                                   |      |
| 28 |                      |                                                                                   |      |
| 29 | Interventions:       | <a href="#">#11d</a> Relevant concomitant care and interventions that are         | n/a  |
| 30 |                      |                                                                                   |      |
| 31 | concomitant care     | permitted or prohibited during the trial                                          |      |
| 32 |                      |                                                                                   |      |
| 33 |                      |                                                                                   |      |
| 34 | Outcomes             | <a href="#">#12</a> Primary, secondary, and other outcomes, including the         | 8,16 |
| 35 |                      |                                                                                   |      |
| 36 |                      | specific measurement variable (eg, systolic blood                                 |      |
| 37 |                      |                                                                                   |      |
| 38 |                      | pressure), analysis metric (eg, change from baseline, final                       |      |
| 39 |                      |                                                                                   |      |
| 40 |                      | value, time to event), method of aggregation (eg, median,                         |      |
| 41 |                      |                                                                                   |      |
| 42 |                      | proportion), and time point for each outcome. Explanation                         |      |
| 43 |                      |                                                                                   |      |
| 44 |                      | of the clinical relevance of chosen efficacy and harm                             |      |
| 45 |                      |                                                                                   |      |
| 46 |                      | outcomes is strongly recommended                                                  |      |
| 47 |                      |                                                                                   |      |
| 48 |                      |                                                                                   |      |
| 49 |                      |                                                                                   |      |
| 50 |                      |                                                                                   |      |
| 51 | Participant timeline | <a href="#">#13</a> Time schedule of enrolment, interventions (including any      | 6    |
| 52 |                      |                                                                                   |      |
| 53 |                      | run-ins and washouts), assessments, and visits for                                |      |
| 54 |                      |                                                                                   |      |
| 55 |                      | participants. A schematic diagram is highly recommended                           |      |
| 56 |                      |                                                                                   |      |
| 57 |                      | (see Figure)                                                                      |      |
| 58 |                      |                                                                                   |      |
| 59 |                      |                                                                                   |      |
| 60 |                      |                                                                                   |      |



|    |                                  |                      |                                                                                                                                                                                                                                                                                                                                                          |     |
|----|----------------------------------|----------------------|----------------------------------------------------------------------------------------------------------------------------------------------------------------------------------------------------------------------------------------------------------------------------------------------------------------------------------------------------------|-----|
| 1  | Sample size                      | <a href="#">#14</a>  | Estimated number of participants needed to achieve study objectives and how it was determined, including clinical and statistical assumptions supporting any sample size calculations                                                                                                                                                                    | 9   |
| 2  |                                  |                      |                                                                                                                                                                                                                                                                                                                                                          |     |
| 3  |                                  |                      |                                                                                                                                                                                                                                                                                                                                                          |     |
| 4  |                                  |                      |                                                                                                                                                                                                                                                                                                                                                          |     |
| 5  |                                  |                      |                                                                                                                                                                                                                                                                                                                                                          |     |
| 6  |                                  |                      |                                                                                                                                                                                                                                                                                                                                                          |     |
| 7  |                                  |                      |                                                                                                                                                                                                                                                                                                                                                          |     |
| 8  |                                  |                      |                                                                                                                                                                                                                                                                                                                                                          |     |
| 9  |                                  |                      |                                                                                                                                                                                                                                                                                                                                                          |     |
| 10 |                                  |                      |                                                                                                                                                                                                                                                                                                                                                          |     |
| 11 | Recruitment                      | <a href="#">#15</a>  | Strategies for achieving adequate participant enrolment to reach target sample size                                                                                                                                                                                                                                                                      | n/a |
| 12 |                                  |                      |                                                                                                                                                                                                                                                                                                                                                          |     |
| 13 |                                  |                      |                                                                                                                                                                                                                                                                                                                                                          |     |
| 14 |                                  |                      |                                                                                                                                                                                                                                                                                                                                                          |     |
| 15 |                                  |                      |                                                                                                                                                                                                                                                                                                                                                          |     |
| 16 | <b>Methods: Assignment</b>       |                      |                                                                                                                                                                                                                                                                                                                                                          |     |
| 17 | <b>of interventions (for</b>     |                      |                                                                                                                                                                                                                                                                                                                                                          |     |
| 18 | <b>controlled trials)</b>        |                      |                                                                                                                                                                                                                                                                                                                                                          |     |
| 19 |                                  |                      |                                                                                                                                                                                                                                                                                                                                                          |     |
| 20 |                                  |                      |                                                                                                                                                                                                                                                                                                                                                          |     |
| 21 |                                  |                      |                                                                                                                                                                                                                                                                                                                                                          |     |
| 22 |                                  |                      |                                                                                                                                                                                                                                                                                                                                                          |     |
| 23 |                                  |                      |                                                                                                                                                                                                                                                                                                                                                          |     |
| 24 | Allocation: sequence generation  | <a href="#">#16a</a> | Method of generating the allocation sequence (eg, computer-generated random numbers), and list of any factors for stratification. To reduce predictability of a random sequence, details of any planned restriction (eg, blocking) should be provided in a separate document that is unavailable to those who enrol participants or assign interventions | 6   |
| 25 |                                  |                      |                                                                                                                                                                                                                                                                                                                                                          |     |
| 26 |                                  |                      |                                                                                                                                                                                                                                                                                                                                                          |     |
| 27 |                                  |                      |                                                                                                                                                                                                                                                                                                                                                          |     |
| 28 |                                  |                      |                                                                                                                                                                                                                                                                                                                                                          |     |
| 29 |                                  |                      |                                                                                                                                                                                                                                                                                                                                                          |     |
| 30 |                                  |                      |                                                                                                                                                                                                                                                                                                                                                          |     |
| 31 |                                  |                      |                                                                                                                                                                                                                                                                                                                                                          |     |
| 32 |                                  |                      |                                                                                                                                                                                                                                                                                                                                                          |     |
| 33 |                                  |                      |                                                                                                                                                                                                                                                                                                                                                          |     |
| 34 |                                  |                      |                                                                                                                                                                                                                                                                                                                                                          |     |
| 35 |                                  |                      |                                                                                                                                                                                                                                                                                                                                                          |     |
| 36 |                                  |                      |                                                                                                                                                                                                                                                                                                                                                          |     |
| 37 |                                  |                      |                                                                                                                                                                                                                                                                                                                                                          |     |
| 38 |                                  |                      |                                                                                                                                                                                                                                                                                                                                                          |     |
| 39 |                                  |                      |                                                                                                                                                                                                                                                                                                                                                          |     |
| 40 |                                  |                      |                                                                                                                                                                                                                                                                                                                                                          |     |
| 41 | Allocation concealment mechanism | <a href="#">#16b</a> | Mechanism of implementing the allocation sequence (eg, central telephone; sequentially numbered, opaque, sealed envelopes), describing any steps to conceal the sequence until interventions are assigned                                                                                                                                                | 6   |
| 42 |                                  |                      |                                                                                                                                                                                                                                                                                                                                                          |     |
| 43 |                                  |                      |                                                                                                                                                                                                                                                                                                                                                          |     |
| 44 |                                  |                      |                                                                                                                                                                                                                                                                                                                                                          |     |
| 45 |                                  |                      |                                                                                                                                                                                                                                                                                                                                                          |     |
| 46 |                                  |                      |                                                                                                                                                                                                                                                                                                                                                          |     |
| 47 |                                  |                      |                                                                                                                                                                                                                                                                                                                                                          |     |
| 48 |                                  |                      |                                                                                                                                                                                                                                                                                                                                                          |     |
| 49 |                                  |                      |                                                                                                                                                                                                                                                                                                                                                          |     |
| 50 |                                  |                      |                                                                                                                                                                                                                                                                                                                                                          |     |
| 51 | Allocation: implementation       | <a href="#">#16c</a> | Who will generate the allocation sequence, who will enrol participants, and who will assign participants to interventions                                                                                                                                                                                                                                | 6   |
| 52 |                                  |                      |                                                                                                                                                                                                                                                                                                                                                          |     |
| 53 |                                  |                      |                                                                                                                                                                                                                                                                                                                                                          |     |
| 54 |                                  |                      |                                                                                                                                                                                                                                                                                                                                                          |     |
| 55 |                                  |                      |                                                                                                                                                                                                                                                                                                                                                          |     |
| 56 |                                  |                      |                                                                                                                                                                                                                                                                                                                                                          |     |
| 57 |                                  |                      |                                                                                                                                                                                                                                                                                                                                                          |     |
| 58 |                                  |                      |                                                                                                                                                                                                                                                                                                                                                          |     |
| 59 |                                  |                      |                                                                                                                                                                                                                                                                                                                                                          |     |
| 60 |                                  |                      |                                                                                                                                                                                                                                                                                                                                                          |     |

|    |                        |                      |                                                                |     |
|----|------------------------|----------------------|----------------------------------------------------------------|-----|
| 1  | Blinding (masking)     | <a href="#">#17a</a> | Who will be blinded after assignment to interventions (eg,     | n/a |
| 2  |                        |                      | trial participants, care providers, outcome assessors, data    |     |
| 3  |                        |                      | analysts), and how                                             |     |
| 4  |                        |                      |                                                                |     |
| 5  |                        |                      |                                                                |     |
| 6  |                        |                      |                                                                |     |
| 7  |                        |                      |                                                                |     |
| 8  | Blinding (masking):    | <a href="#">#17b</a> | If blinded, circumstances under which unblinding is            | n/a |
| 9  | emergency              |                      | permissible, and procedure for revealing a participant's       |     |
| 10 |                        |                      | allocated intervention during the trial                        |     |
| 11 | unblinding             |                      |                                                                |     |
| 12 |                        |                      |                                                                |     |
| 13 |                        |                      |                                                                |     |
| 14 |                        |                      |                                                                |     |
| 15 |                        |                      |                                                                |     |
| 16 | <b>Methods: Data</b>   |                      |                                                                |     |
| 17 | <b>collection,</b>     |                      |                                                                |     |
| 18 | <b>management, and</b> |                      |                                                                |     |
| 19 | <b>analysis</b>        |                      |                                                                |     |
| 20 |                        |                      |                                                                |     |
| 21 |                        |                      |                                                                |     |
| 22 |                        |                      |                                                                |     |
| 23 |                        |                      |                                                                |     |
| 24 |                        |                      |                                                                |     |
| 25 |                        |                      |                                                                |     |
| 26 | Data collection plan   | <a href="#">#18a</a> | Plans for assessment and collection of outcome, baseline,      | 8-9 |
| 27 |                        |                      | and other trial data, including any related processes to       |     |
| 28 |                        |                      | promote data quality (eg, duplicate measurements, training     |     |
| 29 |                        |                      | of assessors) and a description of study instruments (eg,      |     |
| 30 |                        |                      | questionnaires, laboratory tests) along with their reliability |     |
| 31 |                        |                      | and validity, if known. Reference to where data collection     |     |
| 32 |                        |                      | forms can be found, if not in the protocol                     |     |
| 33 |                        |                      |                                                                |     |
| 34 |                        |                      |                                                                |     |
| 35 |                        |                      |                                                                |     |
| 36 |                        |                      |                                                                |     |
| 37 |                        |                      |                                                                |     |
| 38 |                        |                      |                                                                |     |
| 39 |                        |                      |                                                                |     |
| 40 |                        |                      |                                                                |     |
| 41 |                        |                      |                                                                |     |
| 42 |                        |                      |                                                                |     |
| 43 | Data collection plan:  | <a href="#">#18b</a> | Plans to promote participant retention and complete follow-    | n/a |
| 44 | retention              |                      | up, including list of any outcome data to be collected for     |     |
| 45 |                        |                      | participants who discontinue or deviate from intervention      |     |
| 46 |                        |                      | protocols                                                      |     |
| 47 |                        |                      |                                                                |     |
| 48 |                        |                      |                                                                |     |
| 49 |                        |                      |                                                                |     |
| 50 |                        |                      |                                                                |     |
| 51 |                        |                      |                                                                |     |
| 52 |                        |                      |                                                                |     |
| 53 | Data management        | <a href="#">#19</a>  | Plans for data entry, coding, security, and storage,           | 8-9 |
| 54 |                        |                      | including any related processes to promote data quality        |     |
| 55 |                        |                      | (eg, double data entry; range checks for data values).         |     |
| 56 |                        |                      |                                                                |     |
| 57 |                        |                      |                                                                |     |
| 58 |                        |                      |                                                                |     |
| 59 |                        |                      |                                                                |     |
| 60 |                        |                      |                                                                |     |

|    |                            |                                                                                  |     |
|----|----------------------------|----------------------------------------------------------------------------------|-----|
| 1  |                            | Reference to where details of data management                                    |     |
| 2  |                            |                                                                                  |     |
| 3  |                            | procedures can be found, if not in the protocol                                  |     |
| 4  |                            |                                                                                  |     |
| 5  |                            |                                                                                  |     |
| 6  | Statistics: outcomes       | <a href="#">#20a</a> Statistical methods for analysing primary and secondary     | 9   |
| 7  |                            |                                                                                  |     |
| 8  |                            | outcomes. Reference to where other details of the                                |     |
| 9  |                            |                                                                                  |     |
| 10 |                            | statistical analysis plan can be found, if not in the protocol                   |     |
| 11 |                            |                                                                                  |     |
| 12 |                            |                                                                                  |     |
| 13 | Statistics: additional     | <a href="#">#20b</a> Methods for any additional analyses (eg, subgroup and       | 9   |
| 14 |                            |                                                                                  |     |
| 15 | analyses                   | adjusted analyses)                                                               |     |
| 16 |                            |                                                                                  |     |
| 17 |                            |                                                                                  |     |
| 18 |                            |                                                                                  |     |
| 19 | Statistics: analysis       | <a href="#">#20c</a> Definition of analysis population relating to protocol non- | n/a |
| 20 |                            |                                                                                  |     |
| 21 | population and             | adherence (eg, as randomised analysis), and any statistical                      |     |
| 22 |                            |                                                                                  |     |
| 23 | missing data               | methods to handle missing data (eg, multiple imputation)                         |     |
| 24 |                            |                                                                                  |     |
| 25 |                            |                                                                                  |     |
| 26 | <b>Methods: Monitoring</b> |                                                                                  |     |
| 27 |                            |                                                                                  |     |
| 28 |                            |                                                                                  |     |
| 29 | Data monitoring:           | <a href="#">#21a</a> Composition of data monitoring committee (DMC);             | n/a |
| 30 |                            |                                                                                  |     |
| 31 | formal committee           | summary of its role and reporting structure; statement of                        |     |
| 32 |                            |                                                                                  |     |
| 33 |                            | whether it is independent from the sponsor and competing                         |     |
| 34 |                            |                                                                                  |     |
| 35 |                            | interests; and reference to where further details about its                      |     |
| 36 |                            |                                                                                  |     |
| 37 |                            | charter can be found, if not in the protocol. Alternatively, an                  |     |
| 38 |                            |                                                                                  |     |
| 39 |                            | explanation of why a DMC is not needed                                           |     |
| 40 |                            |                                                                                  |     |
| 41 |                            |                                                                                  |     |
| 42 |                            |                                                                                  |     |
| 43 |                            |                                                                                  |     |
| 44 | Data monitoring:           | <a href="#">#21b</a> Description of any interim analyses and stopping            | n/a |
| 45 |                            |                                                                                  |     |
| 46 | interim analysis           | guidelines, including who will have access to these interim                      |     |
| 47 |                            |                                                                                  |     |
| 48 |                            | results and make the final decision to terminate the trial                       |     |
| 49 |                            |                                                                                  |     |
| 50 |                            |                                                                                  |     |
| 51 | Harms                      | <a href="#">#22</a> Plans for collecting, assessing, reporting, and managing     | n/a |
| 52 |                            |                                                                                  |     |
| 53 |                            | solicited and spontaneously reported adverse events and                          |     |
| 54 |                            |                                                                                  |     |
| 55 |                            | other unintended effects of trial interventions or trial                         |     |
| 56 |                            |                                                                                  |     |
| 57 |                            |                                                                                  |     |
| 58 |                            |                                                                                  |     |
| 59 |                            |                                                                                  |     |
| 60 |                            |                                                                                  |     |

|    |                      |                                                                                  |      |
|----|----------------------|----------------------------------------------------------------------------------|------|
| 1  |                      | conduct                                                                          |      |
| 2  |                      |                                                                                  |      |
| 3  |                      |                                                                                  |      |
| 4  | Auditing             | <a href="#">#23</a> Frequency and procedures for auditing trial conduct, if any, | n/a  |
| 5  |                      | and whether the process will be independent from                                 |      |
| 6  |                      | investigators and the sponsor                                                    |      |
| 7  |                      |                                                                                  |      |
| 8  |                      |                                                                                  |      |
| 9  |                      |                                                                                  |      |
| 10 |                      |                                                                                  |      |
| 11 | <b>Ethics and</b>    |                                                                                  |      |
| 12 |                      |                                                                                  |      |
| 13 | <b>dissemination</b> |                                                                                  |      |
| 14 |                      |                                                                                  |      |
| 15 |                      |                                                                                  |      |
| 16 | Research ethics      | <a href="#">#24</a> Plans for seeking research ethics committee / institutional  | 9-10 |
| 17 | approval             | review board (REC / IRB) approval                                                |      |
| 18 |                      |                                                                                  |      |
| 19 | Protocol             | <a href="#">#25</a> Plans for communicating important protocol modifications     | 4    |
| 20 | amendments           | (eg, changes to eligibility criteria, outcomes, analyses) to                     |      |
| 21 |                      | relevant parties (eg, investigators, REC / IRBs, trial                           |      |
| 22 |                      | participants, trial registries, journals, regulators)                            |      |
| 23 |                      |                                                                                  |      |
| 24 | Consent or assent    | <a href="#">#26a</a> Who will obtain informed consent or assent from potential   | 4    |
| 25 |                      | trial participants or authorised surrogates, and how (see                        |      |
| 26 |                      | Item 32)                                                                         |      |
| 27 |                      |                                                                                  |      |
| 28 |                      |                                                                                  |      |
| 29 | Consent or assent:   | <a href="#">#26b</a> Additional consent provisions for collection and use of     | n/a  |
| 30 | ancillary studies    | participant data and biological specimens in ancillary                           |      |
| 31 |                      | studies, if applicable                                                           |      |
| 32 |                      |                                                                                  |      |
| 33 |                      |                                                                                  |      |
| 34 | Confidentiality      | <a href="#">#27</a> How personal information about potential and enrolled        | 9    |
| 35 |                      | participants will be collected, shared, and maintained in                        |      |
| 36 |                      | order to protect confidentiality before, during, and after the                   |      |
| 37 |                      | trial                                                                            |      |
| 38 |                      |                                                                                  |      |
| 39 |                      |                                                                                  |      |
| 40 | Declaration of       | <a href="#">#28</a> Financial and other competing interests for principal        | 11   |
| 41 |                      |                                                                                  |      |
| 42 |                      |                                                                                  |      |
| 43 |                      |                                                                                  |      |
| 44 |                      |                                                                                  |      |
| 45 |                      |                                                                                  |      |
| 46 |                      |                                                                                  |      |
| 47 |                      |                                                                                  |      |
| 48 |                      |                                                                                  |      |
| 49 |                      |                                                                                  |      |
| 50 |                      |                                                                                  |      |
| 51 |                      |                                                                                  |      |
| 52 |                      |                                                                                  |      |
| 53 |                      |                                                                                  |      |
| 54 |                      |                                                                                  |      |
| 55 |                      |                                                                                  |      |
| 56 |                      |                                                                                  |      |
| 57 |                      |                                                                                  |      |
| 58 |                      |                                                                                  |      |
| 59 |                      |                                                                                  |      |
| 60 |                      |                                                                                  |      |

|    |                       |                      |                                                                 |     |
|----|-----------------------|----------------------|-----------------------------------------------------------------|-----|
| 1  | interests             |                      | investigators for the overall trial and each study site         |     |
| 2  |                       |                      |                                                                 |     |
| 3  |                       |                      |                                                                 |     |
| 4  | Data access           | <a href="#">#29</a>  | Statement of who will have access to the final trial dataset,   | 10  |
| 5  |                       |                      | and disclosure of contractual agreements that limit such        |     |
| 6  |                       |                      | access for investigators                                        |     |
| 7  |                       |                      |                                                                 |     |
| 8  |                       |                      |                                                                 |     |
| 9  |                       |                      |                                                                 |     |
| 10 |                       |                      |                                                                 |     |
| 11 | Ancillary and post    | <a href="#">#30</a>  | Provisions, if any, for ancillary and post-trial care, and for  | n/a |
| 12 |                       |                      | compensation to those who suffer harm from trial                |     |
| 13 | trial care            |                      | participation                                                   |     |
| 14 |                       |                      |                                                                 |     |
| 15 |                       |                      |                                                                 |     |
| 16 |                       |                      |                                                                 |     |
| 17 |                       |                      |                                                                 |     |
| 18 |                       |                      |                                                                 |     |
| 19 | Dissemination policy: | <a href="#">#31a</a> | Plans for investigators and sponsor to communicate trial        | 10  |
| 20 |                       |                      | results to participants, healthcare professionals, the public,  |     |
| 21 | trial results         |                      | and other relevant groups (eg, via publication, reporting in    |     |
| 22 |                       |                      | results databases, or other data sharing arrangements),         |     |
| 23 |                       |                      | including any publication restrictions                          |     |
| 24 |                       |                      |                                                                 |     |
| 25 |                       |                      |                                                                 |     |
| 26 |                       |                      |                                                                 |     |
| 27 |                       |                      |                                                                 |     |
| 28 |                       |                      |                                                                 |     |
| 29 |                       |                      |                                                                 |     |
| 30 |                       |                      |                                                                 |     |
| 31 | Dissemination policy: | <a href="#">#31b</a> | Authorship eligibility guidelines and any intended use of       |     |
| 32 |                       |                      | professional writers                                            |     |
| 33 | authorship            |                      |                                                                 |     |
| 34 |                       |                      |                                                                 |     |
| 35 |                       |                      |                                                                 |     |
| 36 | Dissemination policy: | <a href="#">#31c</a> | Plans, if any, for granting public access to the full protocol, | n/a |
| 37 |                       |                      | participant-level dataset, and statistical code                 |     |
| 38 | reproducible research |                      |                                                                 |     |
| 39 |                       |                      |                                                                 |     |
| 40 |                       |                      |                                                                 |     |
| 41 |                       |                      |                                                                 |     |
| 42 | <b>Appendices</b>     |                      |                                                                 |     |
| 43 |                       |                      |                                                                 |     |
| 44 |                       |                      |                                                                 |     |
| 45 | Informed consent      | <a href="#">#32</a>  | Model consent form and other related documentation given        | n/a |
| 46 |                       |                      | to participants and authorised surrogates                       |     |
| 47 | materials             |                      |                                                                 |     |
| 48 |                       |                      |                                                                 |     |
| 49 |                       |                      |                                                                 |     |
| 50 | Biological specimens  | <a href="#">#33</a>  | Plans for collection, laboratory evaluation, and storage of     | n/a |
| 51 |                       |                      | biological specimens for genetic or molecular analysis in       |     |
| 52 |                       |                      | the current trial and for future use in ancillary studies, if   |     |
| 53 |                       |                      | applicable                                                      |     |
| 54 |                       |                      |                                                                 |     |
| 55 |                       |                      |                                                                 |     |
| 56 |                       |                      |                                                                 |     |
| 57 |                       |                      |                                                                 |     |
| 58 |                       |                      |                                                                 |     |
| 59 |                       |                      |                                                                 |     |
| 60 |                       |                      |                                                                 |     |

1 None The SPIRIT checklist is distributed under the terms of the Creative Commons Attribution  
2  
3 License CC-BY-ND 3.0. This checklist can be completed online using <https://www.goodreports.org/>, a  
4  
5 tool made by the [EQUATOR Network](#) in collaboration with [Penelope.ai](#)  
6  
7  
8  
9  
10  
11  
12  
13  
14  
15  
16  
17  
18  
19  
20  
21  
22  
23  
24  
25  
26  
27  
28  
29  
30  
31  
32  
33  
34  
35  
36  
37  
38  
39  
40  
41  
42  
43  
44  
45  
46  
47  
48  
49  
50  
51  
52  
53  
54  
55  
56  
57  
58  
59  
60

# BMJ Open

## **In vitro fertilisation (IVF) versus intracytoplasmic sperm injection (ICSI) in patients without severe male factor infertility: study protocol for the randomised, controlled, multicentre trial INVICSI**

|                                 |                                                                                                                                                                                                                                                                                                                                                                                                                                                                                                                                                                                                                                                                                                                                                                                                                                                                                                                                                                                                                                                                                                                                                                                                                                                                                                                                                                                                                                                                                                                                                                                                                                                                                                                                                                                                                                                                                                                                                                                                                                       |
|---------------------------------|---------------------------------------------------------------------------------------------------------------------------------------------------------------------------------------------------------------------------------------------------------------------------------------------------------------------------------------------------------------------------------------------------------------------------------------------------------------------------------------------------------------------------------------------------------------------------------------------------------------------------------------------------------------------------------------------------------------------------------------------------------------------------------------------------------------------------------------------------------------------------------------------------------------------------------------------------------------------------------------------------------------------------------------------------------------------------------------------------------------------------------------------------------------------------------------------------------------------------------------------------------------------------------------------------------------------------------------------------------------------------------------------------------------------------------------------------------------------------------------------------------------------------------------------------------------------------------------------------------------------------------------------------------------------------------------------------------------------------------------------------------------------------------------------------------------------------------------------------------------------------------------------------------------------------------------------------------------------------------------------------------------------------------------|
| Journal:                        | <i>BMJ Open</i>                                                                                                                                                                                                                                                                                                                                                                                                                                                                                                                                                                                                                                                                                                                                                                                                                                                                                                                                                                                                                                                                                                                                                                                                                                                                                                                                                                                                                                                                                                                                                                                                                                                                                                                                                                                                                                                                                                                                                                                                                       |
| Manuscript ID                   | bmjopen-2021-051058.R1                                                                                                                                                                                                                                                                                                                                                                                                                                                                                                                                                                                                                                                                                                                                                                                                                                                                                                                                                                                                                                                                                                                                                                                                                                                                                                                                                                                                                                                                                                                                                                                                                                                                                                                                                                                                                                                                                                                                                                                                                |
| Article Type:                   | Protocol                                                                                                                                                                                                                                                                                                                                                                                                                                                                                                                                                                                                                                                                                                                                                                                                                                                                                                                                                                                                                                                                                                                                                                                                                                                                                                                                                                                                                                                                                                                                                                                                                                                                                                                                                                                                                                                                                                                                                                                                                              |
| Date Submitted by the Author:   | 10-May-2021                                                                                                                                                                                                                                                                                                                                                                                                                                                                                                                                                                                                                                                                                                                                                                                                                                                                                                                                                                                                                                                                                                                                                                                                                                                                                                                                                                                                                                                                                                                                                                                                                                                                                                                                                                                                                                                                                                                                                                                                                           |
| Complete List of Authors:       | <p>Berntsen, Sine; Hvidovre Hospital, Department of Obstetrics and Gynaecology, The Fertility Clinic, Copenhagen University Hospital Hvidovre</p> <p>Nøhr, Bugge; Herlev Hospital, Department of Obstetrics and Gynaecology, The Fertility Clinic, Copenhagen University Hospital Herlev Grøndahl, Marie Louise; Herlev Hospital, Department of Obstetrics and Gynaecology, The Fertility Clinic, Copenhagen University Hospital Herlev Petersen, Morten; Rigshospitalet, The Fertility Clinic, Copenhagen University Hospital Rigshospitalet</p> <p>Andersen, Lars; North Zealand Hospital, Department of Obstetrics and Gynaecology, Copenhagen University Hospital North Zealand</p> <p>Mikkelsen, Anne Lis; Zealand University Hospital Koge, Department of Obstetrics and Gynaecology, The Fertility Clinic, Zealand University Hospital Koege</p> <p>Knudsen, Ulla; Regional Hospital Horsens, Department of Obstetrics and Gynaecology, The Fertility Clinic, The Regional Hospital Horsens</p> <p>Prætorius, Lisbeth; Hvidovre Hospital, Department of Obstetrics and Gynaecology, The Fertility Clinic, Copenhagen University Hospital Hvidovre</p> <p>Zedeler, Anne; Hvidovre Hospital, Department of Obstetrics and Gynaecology, The Fertility Clinic, Copenhagen University Hospital Hvidovre</p> <p>Nielsen, Henriette; Hvidovre Hospital, Department of Obstetrics and Gynaecology, The Fertility Clinic, Copenhagen University Hospital Hvidovre; University of Copenhagen Faculty of Health and Medical Sciences, Institute of Clinical Medicine</p> <p>Pinborg, Anja; Rigshospitalet, The Fertility Clinic, Copenhagen University Hospital Rigshospitalet; University of Copenhagen Faculty of Health and Medical Sciences, Institute of Clinical Medicine</p> <p>Freiesleben, Nina; Hvidovre Hospital, Department of Obstetrics and Gynaecology, The Fertility Clinic, Copenhagen University Hospital Hvidovre; University of Copenhagen Faculty of Health and Medical Sciences, Institute of Clinical Medicine</p> |
| <b>Primary Subject Heading</b>: | Reproductive medicine                                                                                                                                                                                                                                                                                                                                                                                                                                                                                                                                                                                                                                                                                                                                                                                                                                                                                                                                                                                                                                                                                                                                                                                                                                                                                                                                                                                                                                                                                                                                                                                                                                                                                                                                                                                                                                                                                                                                                                                                                 |
| Secondary Subject Heading:      | Obstetrics and gynaecology                                                                                                                                                                                                                                                                                                                                                                                                                                                                                                                                                                                                                                                                                                                                                                                                                                                                                                                                                                                                                                                                                                                                                                                                                                                                                                                                                                                                                                                                                                                                                                                                                                                                                                                                                                                                                                                                                                                                                                                                            |

1  
2  
3  
4  
5  
6  
7  
8  
9  
10  
11  
12  
13  
14  
15  
16  
17  
18  
19  
20  
21  
22  
23  
24  
25  
26  
27  
28  
29  
30  
31  
32  
33  
34  
35  
36  
37  
38  
39  
40  
41  
42  
43  
44  
45  
46  
47  
48  
49  
50  
51  
52  
53  
54  
55  
56  
57  
58  
59  
60

|           |                                                                                                              |
|-----------|--------------------------------------------------------------------------------------------------------------|
| Keywords: | Subfertility < GYNAECOLOGY, Male infertility < UROLOGY, Reproductive medicine < GYNAECOLOGY, SEXUAL MEDICINE |
|           |                                                                                                              |

SCHOLARONE™  
Manuscripts



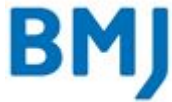

I, the Submitting Author has the right to grant and does grant on behalf of all authors of the Work (as defined in the below author licence), an exclusive licence and/or a non-exclusive licence for contributions from authors who are: i) UK Crown employees; ii) where BMJ has agreed a CC-BY licence shall apply, and/or iii) in accordance with the terms applicable for US Federal Government officers or employees acting as part of their official duties; on a worldwide, perpetual, irrevocable, royalty-free basis to BMJ Publishing Group Ltd ("BMJ") its licensees and where the relevant Journal is co-owned by BMJ to the co-owners of the Journal, to publish the Work in this journal and any other BMJ products and to exploit all rights, as set out in our [licence](#).

The Submitting Author accepts and understands that any supply made under these terms is made by BMJ to the Submitting Author unless you are acting as an employee on behalf of your employer or a postgraduate student of an affiliated institution which is paying any applicable article publishing charge ("APC") for Open Access articles. Where the Submitting Author wishes to make the Work available on an Open Access basis (and intends to pay the relevant APC), the terms of reuse of such Open Access shall be governed by a Creative Commons licence – details of these licences and which [Creative Commons](#) licence will apply to this Work are set out in our licence referred to above.

Other than as permitted in any relevant BMJ Author's Self Archiving Policies, I confirm this Work has not been accepted for publication elsewhere, is not being considered for publication elsewhere and does not duplicate material already published. I confirm all authors consent to publication of this Work and authorise the granting of this licence.

INVICSI: study protocol for a randomised, controlled multicentre trial

Version: 5.0

Date: May 06, 2021

## **In vitro fertilisation (IVF) versus intracytoplasmic sperm injection (ICSI) in patients without severe male factor infertility: study protocol for the randomised, controlled, multicentre trial**

### **INVICSI**

Sine Berntsen<sup>1,\*</sup>, Bugge Nøhr<sup>2</sup>, Marie Louise Grøndahl<sup>2</sup>, Morten Rønn Petersen<sup>3</sup>, Lars Franch Andersen<sup>4</sup>, Anne Lis Mikkelsen Englund<sup>5</sup>, Ulla Breth Knudsen<sup>6,7</sup>, Lisbeth Prætorius<sup>1</sup>, Anne Zedeler<sup>1</sup>, Henriette Svarre Nielsen<sup>1,8</sup>, Anja Pinborg<sup>3,8</sup>, Nina la Cour Freiesleben<sup>1,8</sup>

1. Department of Obstetrics and Gynaecology  
The Fertility Clinic, Hvidovre  
Copenhagen University Hospital Hvidovre  
Kettegaard Alle 30, DK-2650 Hvidovre, Denmark
2. Department of Obstetrics and Gynaecology  
The Fertility Clinic, Herlev  
Copenhagen University Hospital Herlev  
Borgmester Ib Juuls Vej 1, DK-2730 Herlev, Denmark
3. The Fertility Clinic, Rigshospitalet,  
Copenhagen University Hospital Rigshospitalet,  
Blegdamsvej 9, DK-2100 Copenhagen, Denmark
4. Department of Obstetrics and Gynaecology  
Copenhagen University Hospital North Zealand  
Dyrehavevej 29, DK-3400 Hilleroed, Denmark
5. Department of Obstetrics and Gynaecology  
The Fertility Clinic, Koege  
Zealand University Hospital Koege  
Lykkebaekvej 14, DK-4600 Koege, Denmark
6. Department of Obstetrics and Gynaecology  
The Regional Hospital Horsens  
Sundvej 30C, DK-8700 Horsens, Denmark
7. Department of Clinical Medicine  
Aarhus University  
Palle Juul-Jensens Boulevard 82, DK-8200 Aarhus N, Denmark
8. Institute of Clinical Medicine,  
Faculty of Health and Medical Sciences

1 INVICSI: study protocol for a randomised, controlled multicentre trial

2 Version: 5.0

3 Date: May 06, 2021

4 University of Copenhagen,  
5 Blegdamsvej 3B, DK-2200 Copenhagen, Denmark

6  
7  
8  
9 \*Corresponding author; sineberntsen@gmail.com

10  
11  
12  
13  
14  
15  
16  
17  
18  
19  
20  
21  
22  
23  
24  
25  
26  
27  
28  
29  
30  
31  
32  
33 **Abstract**

34 Introduction: Over the last decades, the use of intracytoplasmic sperm injection (ICSI) has  
35 increased, even among patients without male factor infertility. The increase has happened even  
36 though there is no evidence to support that ICSI results in higher live birth rates compared to  
37 conventional in vitro fertilisation (IVF) in cases with non-male factor infertility. The lack of robust  
38 evidence on an advantage of using ICSI over conventional IVF in these patients is problematic  
39 since ICSI is more invasive, complex and requires additional resources, time and effort. Therefore,  
40 the primary objective of the IN Vitro fertilisation versus IntraCytoplasmic Sperm Injection study  
41 (INVICSI) is to determine whether ICSI is superior to standard IVF in patients without severe male  
42 factor infertility. The primary outcome measure is first live birth from fresh and frozen-thawed  
43  
44  
45  
46  
47  
48  
49  
50  
51  
52  
53  
54  
55  
56  
57  
58  
59  
60

1 INVICSI: study protocol for a randomised, controlled multicentre trial

2 Version: 5.0

3 Date: May 06, 2021

4  
5 transfers after one stimulated cycle. Secondary outcomes include fertilisation rate, ongoing  
6 pregnancy rate, birthweight and congenital anomalies.  
7

8  
9  
10 Methods and analysis: This is a two-armed, multicentre, randomised, controlled trial. In total, 824  
11 with infertility without severe male factor will be recruited and allocated randomly into two groups  
12 (IVF or ICSI) in a 1:1 ratio. Participants will be randomised in variable block sizes and stratified by  
13 trial site and age. The main inclusion criteria are; (i) no prior IVF/ICSI treatment (ii) male partner  
14 sperm with an expected count of minimum 2 million progressive motile spermatozoa following  
15 density gradient purification on the day of oocyte pick-up (OPU) and (iii) age of the woman  
16 between 18 and 42 years.  
17

18  
19  
20 Ethics and dissemination: The study will be performed in accordance with the ethical principles in  
21 the Helsinki Declaration. The study is approved by the Scientific Ethical Committee of the Capital  
22 Region of Denmark. Study findings will be presented, irrespectively of results at international  
23 conferences and submitted for publication in peer-reviewed journals. ClinicalTrials.gov ID:  
24  
25  
26  
27  
28  
29  
30  
31  
32  
33  
34  
35  
36  
37  
38  
39  
40  
41  
42  
43  
44  
45  
46  
47  
48  
49  
50  
51  
52  
53  
54  
55  
56  
57  
58  
59  
60  
NCT04128904

### **Strengths and limitations of this study**

- This is a randomised controlled trial with concealment of treatment allocation, stratification for age and trial site and use of variable block sizes reducing the risk of selection bias and confounding.
- The large number of subjects included, and the multicentre approach of the study increases generalisability of the results.
- The primary outcome is first live birth episode ensuring maximum clinical impact.

INVICSI: study protocol for a randomised, controlled multicentre trial

Version: 5.0

Date: May 06, 2021

- Only first cycle patients are included to avoid selection bias based on the knowledge of results from previous treatment cycles.
- The study is not blinded neither to study participants nor clinicians which could potentially introduce bias.

## **Introduction**

Since the introduction of ICSI in the early 1990's[1], the use of ICSI has continuously increased and it is now used widely for indications other than male factor infertility. The latest reports from the European Society of Human Reproduction and Embryology (ESHRE) and The International Committee Monitoring Assisted Reproductive Technologies (ICMART) show that in Europe and globally, ICSI is used in around two-thirds of all fresh assisted reproductive technology (ART) cycles[2, 3]. The ICMART report further accentuates the significant disparities that exists in ART practices across countries. An especially high ICSI:IVF ratio is found in the Middle East where the proportion of ICSI cycles in some countries is now 100% of all fresh cycles. It is unlikely that the large disparities between countries can be explained by differences in the prevalence of male factor infertility alone. In the United States (US), a recent study, including data from 2000-2014, showed a substantial increase (52% increase) in the use of ICSI with no corresponding increase in couples treated for male factor infertility[4]. Likewise, another US study found that the largest increase in the use of ICSI between 1996-2012 (from 36% in 1996 to 76% in 2012) was observed among couples without male factor infertility (from 15% to 67%)[5]. The observed increase has happened despite the fact that the use of ICSI for non-male factor infertility remains controversial[6]. While ICSI has resulted in high success rates in couples treated for severe male factor infertility, studies have indicated that ICSI offers no advantage over conventional IVF in non-

1 INVICSI: study protocol for a randomised, controlled multicentre trial

2 Version: 5.0

3 Date: May 06, 2021

4  
5 male factor infertility couples when it comes to live birth rates[7-11]. Moreover, the American  
6  
7 Society for Reproductive Medicine (ASRM) recently published a committee opinion stating that 'in  
8  
9 cases without male factor infertility or a history of prior fertilisation failure, the routine use of ICSI  
10  
11 for all oocytes is not supported by the available evidence'[12]. In the US study from 2018, the large  
12  
13 increase in use of ICSI was correlated with a 7.6%, (P=0.001) increase in live birth rates per cycle  
14  
15 in women younger than 35 years. When including only data from the most recent years (2008-  
16  
17 2014) the correlation between ICSI rates and live birth rates disappeared questioning whether the  
18  
19 ICSI method is responsible for the increased live birth rate [4]. The increased use of ICSI without  
20  
21 the presence of male factor infertility could be attributed to a general belief that ICSI decreases the  
22  
23 risk of fertilisation failure in patients treated for other indications. Indeed, a systematic review and  
24  
25 meta-analysis from 2013 reported higher fertilisation rates and a lower risk of fertilisation failure  
26  
27 after ICSI compared with conventional IVF in sibling oocytes from patients with unexplained  
28  
29 infertility[13]. Yet, many of the included studies did not ascertain their findings with an improvement  
30  
31 in clinical outcome (often due to mixed transfers of embryos from IVF and ICSI). Furthermore,  
32  
33 other studies find no difference in fertilisation rates or comparable rates of fertilisation failure  
34  
35 between the two methods[14-18]. Overall, there is a shortage of randomised controlled trials  
36  
37 (RCTs) comparing ICSI and conventional IVF in patients without male factor infertility and the  
38  
39 generalisability of findings from existing studies is limited[19]. In an RCT, including 415 patients  
40  
41 with non-male factor infertility, comparable pregnancy rates between ICSI and conventional IVF  
42  
43 were observed as well as higher fertilisation rates in the conventional IVF group[16]. Regrettably,  
44  
45 live birth rate was not included as an outcome. A large cohort study, including 745 women aged 40  
46  
47 years or older, reported similar live birth rates after ICSI and conventional IVF as well as similar  
48  
49 rates of fertilisation and fertilisation failure[7]. Likewise, ICSI does not seem to improve  
50  
51  
52  
53  
54  
55  
56  
57  
58  
59  
60

1 INVICSI: study protocol for a randomised, controlled multicentre trial

2 Version: 5.0

3 Date: May 06, 2021

4  
5 reproductive outcome in women with diminished ovarian reserve (compared to conventional  
6 IVF)[20, 21]. One group that might benefit from ICSI are non-male factor infertility patients with a  
7 history of total fertilisation failure (or low fertilisation)[22].  
8  
9

10  
11  
12 In conclusion, there are still significant gaps in the knowledge regarding ICSI versus conventional  
13 IVF for couples with normal and non-severe male factor infertility. Especially when including  
14 considerations of cost (either for the individual patient or for the public health care system) and  
15 complexity of the methods.  
16  
17

18  
19 The purpose of the INVICSI study is to address this knowledge gap and to infer whether ICSI is  
20 more effective than standard IVF in patients without severe male factor infertility. The primary  
21 outcome measure is first live birth.  
22  
23  
24  
25  
26  
27  
28  
29  
30

## 31 **Methods and analysis**

### 32 **Hypothesis**

33  
34 ICSI is superior to standard IVF for obtaining live birth of a child in fertility patients without severe  
35 male factor infertility.  
36  
37  
38  
39  
40  
41  
42  
43

### 44 **Study design**

45  
46 The INVICSI study is a multicentre, randomised, controlled trial using a parallel arm design to  
47 detect whether ICSI is superior to standard IVF in patients without severe male factor infertility.  
48  
49

50 Patients will be randomised (1:1) to receive insemination of their retrieved eggs with either  
51 standard IVF or ICSI. Trial registration data are displayed in Table 1. Table 2 provides an overview  
52 of revision chronology including current protocol date and version identifier. Protocol modifications  
53 are registered continuously on Clinical Trials.gov. The SPIRIT reporting guidelines were used[23].  
54  
55  
56  
57  
58  
59  
60

1 INVICSI: study protocol for a randomised, controlled multicentre trial

## 2 3 4 5 6 7 **Setting**

8  
9  
10 The trial will be conducted in six public fertility clinics in Denmark. All clinics are part of a university  
11 hospital setting and all hospitals perform standardised treatments according to the public health  
12 care system in Denmark. The teams recruiting patients at the trial sites will include fertility doctors,  
13 nursing staff and embryologists. Patient enrolment began in November 2019 and will continue until  
14 December 2023.  
15  
16  
17  
18  
19  
20  
21  
22  
23

## 24 **Eligibility criteria**

25 All couples/women referred for their first fertility treatment at six public fertility clinics in Denmark  
26 are screened for eligibility with the following inclusion and exclusion criteria:  
27  
28  
29  
30

### 31 Inclusion:

- 32  
33
- 34 a. Written informed consent
  - 35  
36 b. Age of the woman 18-42 years
  - 37  
38 c.
    - 39  
40  
41 i. Male partner with normal or non-severely decreased sperm parameters where the  
42 semen sample (following density gradient purification) on the day of OPU is  
43 expected to contain a minimum of 2 million progressive motile spermatozoa
    - 44  
45  
46  
47  
48 ii. Couples/singles using donor sperm
  - 49  
50 d. Body-mass-index (BMI) of the woman between 18-35 kg/m<sup>2</sup>
  - 51  
52 e. First fertility treatment due to:
    - 53  
54  
55 i. Tubal factor
    - 56  
57  
58 ii. Unexplained infertility
  - 59  
60



1 INVICSI: study protocol for a randomised, controlled multicentre trial

2 Version: 5.0

3 Date: May 06, 2021

- 4
- 5 iii. Polycystic ovary syndrome (PCOS)
- 6
- 7
- 8 iv. Light to moderate decreased semen quality in the male partner
- 9

10

11

12 Exclusion:

13

- 14
- 15 a. Consent not obtained
- 16
- 17 b. Significant morbidity in the woman:
- 18
- 19 i. Ovarian cysts >4 cm
- 20
- 21
- 22 ii. Known liver or kidney disease
- 23
- 24
- 25 iii. Unregulated thyroid disease
- 26
- 27
- 28 iv. Endometriosis stage 3-4
- 29
- 30
- 31 v. Hypogonadotropic hypogonadism
- 32
- 33
- 34 vi. Other severe comorbidity (e.g. diabetes or cardiovascular disease)
- 35
- 36 c. Previous IVF or ICSI treatments with current partner
- 37
- 38
- 39 d. Use of donor oocytes or frozen oocytes
- 40
- 41
- 42 e. Not speaking or understanding Danish or English language

43 Couples using sperm from the male partner as well as couples (or single women) using donor sperm

44 are eligible. Subsequently, randomisation and inclusion will be based on data from the female

45 participant receiving the ovarian stimulation treatment.

46

47

48

49

50

51

52 The study was originally designed and performed with the additional inclusion criteria of regular

53 menstrual cycles (21-35 days) and a diagnostic sperm sample from the male partner with a minimum

54 of 5 mill. progressive motile spermatozoa and  $\geq 4\%$  morphologically normal spermatozoa (Table 2).

55

56

57

58

59

60

1 INVICSI: study protocol for a randomised, controlled multicentre trial

2 Version: 5.0

3 Date: May 06, 2021

4  
5 However, an amendment was added after the inclusion of 28 participants in May 2020. In this  
6  
7 amendment, two of the aforementioned criteria were removed (regular menstrual cycle and minimum  
8  
9 percentage of morphological normal sperm). The criterion for sperm morphology was removed  
10  
11 because the importance of sperm morphology and whether it should be used to predict fertilisation  
12  
13 and reproductive outcome in ART has been questioned [24-28]. The criterion for regular menstrual  
14  
15 cycle was removed as current evidence suggests that women with PCOS have similar chances of  
16  
17 conceiving with fertility treatment compared to women without PCOS[29-31].  
18  
19

20  
21  
22 In September 2019, the criterion for a diagnostic semen sample with a minimum of 5 mill. progressive  
23  
24 motile spermatozoa was also removed (after the inclusion of 88 participants). Due to differences in  
25  
26 laboratory techniques and standard tests performed prior to IVF/ICSI on the trial sites, it was not  
27  
28 feasible to include a criterion for a diagnostic semen sample. The criterion for number of  
29  
30 spermatozoa in the semen sample on the day of OPU remained unchanged.  
31  
32

### 33 34 35 36 **Screening, inclusion and consent**

37  
38 Potentially eligible patients receive verbal and written information about the study by the  
39  
40 investigators during a consultation in the fertility clinic. Inclusion and randomisation of participants  
41  
42 to either ICSI or conventional IVF take place after the ovulation trigger has been prescribed and  
43  
44 before the oocyte collection. This is to avoid the risk of the allocation group (IVF or ICSI) affecting  
45  
46 the clinicians' choice when deciding the dose of the follicle stimulating hormone as well as the  
47  
48 timing (or cancellation) of oocyte collection. Also, this ensures that the decision for inclusion is not  
49  
50 based on the number of oocytes collected. Couples/women who wish to participate in the trial are  
51  
52 asked to sign an informed consent form prior to enrolment. They will usually have a minimum of  
53  
54 two days between receiving the information and deciding whether they wish to participate in the  
55  
56  
57  
58  
59  
60

1 INVICSI: study protocol for a randomised, controlled multicentre trial

2 Version: 5.0

3 Date: May 06, 2021

4  
5 study or not. When a patient has given consent and inclusion criteria are met, randomisation is  
6  
7 conducted in the online platform REDCap, which is also used for data collection during the  
8  
9 study[32]. The REDCap database has a complete audit trail and is based on anonymous subject  
10  
11 ID numbers. It is not revealed whether the patient is assigned to standard IVF or ICSI until after the  
12  
13 patient has been recruited and baseline data has been entered in REDCap ensuring treatment  
14  
15 allocation concealment. Participants can withdraw from the trial at any time without giving an  
16  
17 explanation, and their fertility treatment will not be affected.  
18  
19  
20  
21  
22  
23

## 24 **Randomisation**

25  
26 An independent statistician prepared the computer-generated randomisation scheme in a 1:1 ratio  
27  
28 between the two arms (IVF and ICSI). Permuted blocks of variable size between 4 and 12 were  
29  
30 used for randomisation. The randomisation scheme was stratified by trial site and female age  
31  
32 (three age groups: 18-25 years of age, 26-37 years of age and 38-41 years of age) to ensure that  
33  
34 the number of participants receiving IVF and ICSI is closely balanced within each stratum. The  
35  
36 randomisation procedure is performed online in REDCap. The allocation table was uploaded in  
37  
38 REDCap by the independent statistician and concealed from the clinical staff performing the  
39  
40 randomisation. The unique Danish social security number of each participant is entered initially  
41  
42 ensuring that no participants are randomised twice.  
43  
44  
45  
46  
47  
48  
49

## 50 **Poor semen sample on the day of OPU**

51  
52 If the purified semen sample contains less than 2 million progressive spermatozoa on the day of  
53  
54 OPU, the woman/couple will be treated with ICSI regardless of allocation.  
55  
56  
57  
58  
59  
60

1 INVICSI: study protocol for a randomised, controlled multicentre trial

## 2 3 4 5 **Blinding**

6  
7 The study is designed with no blinding of participants, clinicians or assessors. It was decided not to  
8  
9  
10 blind clinicians and participants as our experience shows that patients in the Danish fertility clinics  
11  
12 are eager to know the insemination method used in their treatment. Hence, it was deemed  
13  
14 unrealistic to recruit participants if allocation was only revealed after the endpoints were reached.  
15  
16

## 17 18 19 **Intervention**

20 The participants will receive conventional IVF or ICSI treatment as determined by randomisation.

21 Both treatments are part of standard treatment regimens at the trial sites.

22 The fertility treatment:

23  
24  
25  
26  
27  
28  
29 The women have been treated in either a short gonadotropin-releasing hormone (GnRH)-  
30  
31 antagonist protocol or a long GnRH-agonist protocol for ovarian stimulation. Both the controlled  
32  
33 ovarian stimulation, transvaginal ultrasound examinations and the ovulation triggering are done  
34  
35 according to the usual daily practice at the trial sites with ovulation trigger prescribed when a  
36  
37 minimum of two to three follicles measure 17 mm or more. Women with only one mature follicle  
38  
39 may also be prescribed the ovulation trigger. OPU is performed  $36\pm 2$  hours after the ovulation  
40  
41 trigger is administered. On the day of OPU the concentrations of all spermatozoa and progressive  
42  
43 motile spermatozoa are assessed in the ejaculate. Following density gradient purification, wash  
44  
45 steps and resuspension in 1 mL media the number of all spermatozoa as well as the number of  
46  
47 progressive motile spermatozoa are assessed again. In cases with a high concentration of  
48  
49 spermatozoa in the ejaculate it is allowed to purify only part of the sample. In this case, a  
50  
51 theoretical (after purification) total yield is calculated.  
52  
53  
54  
55  
56  
57  
58  
59  
60

1 INVICSI: study protocol for a randomised, controlled multicentre trial

2 Version: 5.0

3 Date: May 06, 2021

4  
5 Oocyte insemination will be IVF or ICSI according to randomisation, using established procedures  
6  
7 at the trial sites. However, short time insemination in the IVF arm is not allowed. In case of total  
8  
9 fertilisation failure, rescue ICSI is not performed. Embryo culture and luteal phase support will  
10  
11 follow the usual procedures at each trial site. Blastocyst transfer is performed on day 5. Patients  
12  
13 with a poor ovarian reserve and few oocytes retrieved ( $\leq 4$ ) are allowed transfer day 2 or 3  
14  
15 according to clinical practice. Single embryo transfers are planned. Surplus blastocysts of good  
16  
17 quality are vitrified on day 5 or 6. Transfer and cryopreservation are done according to usual  
18  
19 practice at each trial site. In cases with total freeze of all blastocysts due to the risk of ovarian  
20  
21 hyperstimulation syndrome (OHSS), women are not excluded from the trial. In cases where all  
22  
23 blastocysts or spare blastocysts are vitrified these are transferred in subsequent frozen-thawed  
24  
25 embryo transfer (FET) cycles according to the daily practice at each trial site (i.e., natural cycles,  
26  
27 substituted or stimulated FET cycles).

28  
29 Urine pregnancy test or a serum pregnancy test is done 11-16 days after embryo transfer. If  
30  
31 pregnancy is achieved, a transvaginal ultrasound scan is performed at pregnancy week 7-9 to  
32  
33 confirm an ongoing and intrauterine pregnancy.

34  
35 Women will be asked to inform the clinic of the result of the pregnancy as is the usual procedure in  
36  
37 the clinic.

### 38 39 **Study outcomes**

40  
41 Primary endpoint:

42  
43 The primary endpoint for the INVICSI trial is the first live birth episode following the study cycle in  
44  
45 each of the two groups (IVF and ICSI). This is defined as the first live birth from the oocyte  
46  
47 collection and includes transfer of fresh embryos and frozen-thawed embryos. The minimum  
48  
49

1 INVICSI: study protocol for a randomised, controlled multicentre trial

2  
3  
4  
5 follow-up time will be one year after inclusion. Live birth is defined as the delivery of one or more  
6  
7 living infants  $\geq 22$  weeks gestation. When the primary endpoint is achieved, further live births from  
8  
9 the oocyte collection will not be included in the primary outcome analysis. Subsequent live births  
10  
11 from any FET cycles with embryos from the first fresh cycle are included as a secondary outcome  
12  
13 (all live birth episodes). The secondary outcomes are summarised in Table 3.  
14  
15

### 16 17 18 19 **Data collection methods**

20  
21 Before treatment is initiated all fertility patients in the clinics fill out a standard form including data  
22  
23 on fertility and medical history, ethnicity, medications, smoking, alcohol, height, weight etc. These  
24  
25 data are routinely entered into electronic medical files of the fertility clinics by fertility doctors prior  
26  
27 to the patients first consultation in the clinic. This is part of standard practice for all fertility patients.  
28  
29 For the INVICSI study, baseline data will be gathered by the investigators from the electronic files  
30  
31 after written informed consent has been given (age, weight, height, ethnicity, antral follicle count  
32  
33 (AFC), anti-müllerian hormone (AMH) concentration, years of infertility, primary or secondary  
34  
35 infertility, infertility diagnosis, stimulation protocol, sperm characteristics). Data will then be entered  
36  
37 into REDCap after which the randomisation and allocation to either standard IVF or ICSI will occur.  
38  
39 Data on treatment outcome including fertilisation, embryo development, pregnancy and pregnancy  
40  
41 loss (secondary outcomes, Table 3) will be collected and entered in REDCap. The couple/woman  
42  
43 is asked to consent to data being obtained from the child's file in case the fertility treatment results  
44  
45 in the birth of a living child.  
46  
47

48  
49 To ensure data collection, an investigator will follow-up on all participants that obtains pregnancy.  
50  
51 Follow-up will take place one year after the ultrasound scan (week 7-9). If the participant has  
52  
53  
54  
55  
56  
57  
58  
59  
60

1 INVICSI: study protocol for a randomised, controlled multicentre trial

2 Version: 5.0

3 Date: May 06, 2021

4 informed the fertility clinic on birth and child, an investigator will contact the participant via a phone  
5 call or retrieve all information from the electronic patient record.  
6  
7  
8  
9

## 10 11 12 **Statistical considerations**

13  
14  
15 Proposed sample size:

16  
17 The rate of first live births after transfer of up to all of the transferable embryos from the first OPU is  
18 set to 45% in the conventional IVF group and 55 % in the ICSI group. This is a superiority trial with  
19 a power of 80% and a 2-sided p-value of 5%. The sample size is estimated to be 392 patients in  
20 each group. Post-randomization exclusion is expected to be 5%, resulting in a total of 824 patients.  
21  
22  
23  
24  
25

26  
27 Data analysis:

28  
29 ITT analysis and per-protocol analysis will be performed. Baseline characteristics and outcomes  
30 will be compared using t-test, Mann-Whitney U test or chi-square tests for continuous and  
31 categorical variables or logistic regression analysis, controlling for possible confounding effects  
32 where appropriate. P-values of <0.05 will be considered statistically significant. Statistical analyses  
33 will be performed by an investigator together with statistical experts. The primary RCT analysis will  
34 be performed by an independent statistician blinded to group allocation.  
35  
36  
37  
38  
39  
40  
41  
42  
43  
44  
45

## 46 **Patient and Public Involvement**

47  
48 There has been no patient or public involvement in the development of study design, recruitment or  
49 research question.  
50  
51  
52  
53  
54

## 55 **Ethics and dissemination**

### 56 57 **Data security and ethical aspects**

1 INVICSI: study protocol for a randomised, controlled multicentre trial

2  
3  
4  
5 Data to describe the study population and the outcomes will be collected in a single database

6  
7 including all participants with an identification code, which makes every participant anonymous in  
8  
9 the database.

10  
11  
12 The study is approved by the Scientific Ethical Committee of the Capital Region of Denmark (H-  
13  
14 19022201) and the Danish Knowledge Centre on Data Protection Compliance. The study will be  
15  
16 performed according to the Danish Law and Ethical principles in the Helsinki Declaration. Each  
17  
18 participant will receive oral and written information about the study and will have opportunity for  
19  
20 time and reflection. They can also discuss their participation with a third person. The collected  
21  
22 oocytes of the participants will be fertilised with IVF or ICSI according to randomisation. Some  
23  
24 couples/women may experience no fertilisation after either IVF or ICSI in the study. This risk is not  
25  
26 considered significantly higher compared to women who do not participate in the study. The study  
27  
28 is registered with the National Institute of Health's ClinicalTrials.gov (NCT04128904).  
29  
30  
31  
32  
33  
34  
35

### 36 **Dissemination**

37  
38 The findings of the study will be presented at national and international fertility conferences, such  
39  
40 as the European Society of Human Reproduction and Embryology (ESHRE) annual meeting. In  
41  
42 addition, the findings will be published in peer reviewed scientific journals. Public dissemination will  
43  
44 be in the lay press.  
45  
46  
47  
48  
49

### 50 **Data-sharing**

51  
52 Data from the trial will be shared according to the ICJME guidelines. On request, data can be  
53  
54 shared with parties presenting relevant aims for the use of data. Purposes and financial aspects of  
55  
56 the other party must be approved by the steering committee of the "INVICSI" research team. No  
57  
58  
59  
60



1 INVICSI: study protocol for a randomised, controlled multicentre trial

2 Version: 5.0

3 Date: May 06, 2021

4  
5 data will be shared until three months after the publication of papers reporting the primary and  
6  
7 secondary outcomes of the trial. Any new research project must be approved by Danish  
8  
9 authorities. The requesting party cover the costs for data sharing.  
10  
11  
12  
13  
14

## 15 **Discussion**

16  
17 Worldwide, the rate of treatment cycles where oocytes are fertilised with ICSI is increasing, also in  
18  
19 patients without severe male factor infertility. Currently there is no evidence to support that ICSI  
20  
21 results in a higher live birth rate compared to standard IVF in these patients. If the INVICSI study  
22  
23 finds that ICSI is superior to standard IVF in cases without severe male factor infertility, the  
24  
25 increasing use of ICSI is justified and may then be recommended. However, if the INVICSI study  
26  
27 fails to show superiority of ICSI, standard IVF should be recommended as the preferred first choice  
28  
29 method of fertilisation in patients without severe male factor infertility. This could potentially lead to  
30  
31 significant cost savings and a higher use of standard IVF which is less invasive, closer to natural  
32  
33 fertilisation and less expensive.  
34  
35  
36  
37  
38  
39  
40

## 41 **Authors' contributions:**

42  
43 SB and NCF were responsible for the conception, design and execution of the study protocol. SB,  
44  
45 NCF and AP contributed to the initial revision and editing of the manuscript. AZ was consulted  
46  
47 concerning the laboratory details of the study design. SB, NCF, AP, AZ, ALME, UBK, MRP, LFA,  
48  
49 BN, HSN, LP, and MLG contributed to the critical revision of the manuscript as well as the approval  
50  
51 of the final version for submission in BMJ Open.  
52  
53  
54  
55  
56  
57

## 58 **Funding:**

1 INVICSI: study protocol for a randomised, controlled multicentre trial

2 Version: 5.0

3 Date: May 06, 2021

4  
5 The study is funded by a research grant from the Capital Region of Denmark (grant number  
6 A6606) and by two unrestricted grants from Gedeon Richter (grant number is not applicable).

7  
8 Gedeon Richter and the Capital Region of Denmark had no role in the design of the study and will  
9  
10 not have any role during the execution, analysis, interpretation of the data, or decision to submit  
11  
12 results.  
13  
14  
15

### 16 17 18 19 **Competing interests:**

20  
21 SB and NCF received a research grant from the Capital Region of Denmark and two unrestricted  
22 grants from Gedeon Richter to support the INVICSI study as mentioned under 'Funding'. Outside  
23 the submitted work authors have received grants/fees/funding or declare relationships with the  
24 following third parties:  
25  
26  
27  
28  
29

30  
31 SB: Gedeon Richter, the Capitol Region of Denmark. NCF: Gedeon Richter, Ferring  
32 Pharmaceuticals, Merck A/S, Head of the steering committee for the Danish Fertility Guidelines  
33 made by members of the Danish Fertility Society (no payment), Guerbet, Advisory Board (personal  
34 fee). AP: Gedeon Richter, Ferring Pharmaceuticals, Merck A/S, Theramex. UBK: IBSA, Ferring  
35 Pharmaceuticals, Merck A/S. LFA: Gedeon Richter. BN: Gedeon Richter, IBSA, Merck A/S. HSN:  
36 Ferring Pharmaceuticals, Merck A/S, AstraZeneca, Cook Medical, Freya Biosciences ApS, Ferring  
37 Pharmaceuticals, BioInnovation Institute, Danish Ministry of Education. MLG: Gedeon Richter,  
38 Merck A/S. LP: Gedeon Richter, Merck A/S.  
39  
40  
41  
42  
43  
44  
45  
46  
47  
48  
49

50 The authors do not report any potential conflict of interest.  
51  
52  
53  
54  
55  
56  
57

### 58 **References:**

59  
60

1 INVICSI: study protocol for a randomised, controlled multicentre trial

2 Version: 5.0

3 Date: May 06, 2021

- 4
- 5 1. Palermo G, Joris H, Devroey P, et al. Pregnancies after intracytoplasmic injection of single  
6 spermatozoon into an oocyte. *Lancet*. 1992;340(8810):17-8.
  - 7 2. De Geyter C, Calhaz-Jorge C, Kupka MS, et al. ART in Europe, 2015: results generated from  
8 European registries by ESHRE. *Hum Reprod Open*. 2020;2020(1):hoz038.
  - 9 3. de Mouzon J, Chambers GM, Zegers-Hochschild F, et al. International Committee for  
10 Monitoring Assisted Reproductive Technologies world report: assisted reproductive technology  
11 2012dagger. *Hum Reprod*. 2020;35(8):1900-13.
  - 12 4. Zagadailov P, Hsu A, Stern JE, et al. Temporal Differences in Utilization of Intracytoplasmic  
13 Sperm Injection Among U.S. Regions. *Obstet Gynecol*. 2018;132(2):310-20.
  - 14 5. Boulet SL, Mehta A, Kissin DM, et al. Trends in use of and reproductive outcomes associated  
15 with intracytoplasmic sperm injection. *JAMA*. 2015;313(3):255-63.
  - 16 6. Evers JL. Santa Claus in the fertility clinic. *Hum Reprod*. 2016;31(7):1381-2.
  - 17 7. Tannus S, Son WY, Gilman A, et al. The role of intracytoplasmic sperm injection in non-male  
18 factor infertility in advanced maternal age. *Hum Reprod*. 2017;32(1):119-24.
  - 19 8. Gennarelli G, Carosso A, Canosa S, et al. ICSI Versus Conventional IVF in Women Aged 40  
20 Years or More and Unexplained Infertility: A Retrospective Evaluation of 685 Cycles with Propensity Score  
21 Model. *J Clin Med*. 2019;8(10).
  - 22 9. Sfontouris IA, Kolibianakis EM, Lainas GT, et al. Live birth rates using conventional in vitro  
23 fertilization compared to intracytoplasmic sperm injection in Bologna poor responders with a single oocyte  
24 retrieved. *J Assist Reprod Genet*. 2015;32(5):691-7.
  - 25 10. Li Z, Wang AY, Bowman M, et al. ICSI does not increase the cumulative live birth rate in non-  
26 male factor infertility. *Hum Reprod*. 2018;33(7):1322-30.
  - 27 11. Foong SC, Fleetham JA, O'Keane JA, et al. A prospective randomized trial of conventional in  
28 vitro fertilization versus intracytoplasmic sperm injection in unexplained infertility. *J Assist Reprod Genet*.  
29 2006;23(3):137-40.
  - 30 12. Practice Committees of the American Society for Reproductive M, the Society for Assisted  
31 Reproductive Technology. Electronic address aao. Intracytoplasmic sperm injection (ICSI) for non-male  
32 factor indications: a committee opinion. *Fertil Steril*. 2020;114(2):239-45.
  - 33 13. Johnson LN, Sasson IE, Sammel MD, et al. Does intracytoplasmic sperm injection improve the  
34 fertilization rate and decrease the total fertilization failure rate in couples with well-defined unexplained  
35 infertility? A systematic review and meta-analysis. *Fertil Steril*. 2013;100(3):704-11.
  - 36 14. Vitek WS, Galarraga O, Klatsky PC, et al. Management of the first in vitro fertilization cycle  
37 for unexplained infertility: a cost-effectiveness analysis of split in vitro fertilization-intracytoplasmic sperm  
38 injection. *Fertil Steril*. 2013;100(5):1381-8.
  - 39 15. Kim HH, Bundorf MK, Behr B, et al. Use and outcomes of intracytoplasmic sperm injection for  
40 non-male factor infertility. *Fertil Steril*. 2007;88(3):622-8.
  - 41 16. Bhattacharya S, Hamilton MP, Shaaban M, et al. Conventional in-vitro fertilisation versus  
42 intracytoplasmic sperm injection for the treatment of non-male-factor infertility: a randomised controlled  
43 trial. *Lancet*. 2001;357(9274):2075-9.
  - 44 17. Ruiz A, Remohi J, Minguez Y, et al. The role of in vitro fertilization and intracytoplasmic  
45 sperm injection in couples with unexplained infertility after failed intrauterine insemination. *Fertil Steril*.  
46 1997;68(1):171-3.
  - 47 18. Isikoglu M, Avci A, Kendirci Ceviren A, et al. Conventional IVF revisited: Is ICSI better for non-  
48 male factor infertility? Randomized controlled double blind study. *J Gynecol Obstet Hum Reprod*.  
49 2020;50(7):101990.
  - 50 19. van Rumste MM, Evers JL, Farquhar CM. Intra-cytoplasmic sperm injection versus  
51 conventional techniques for oocyte insemination during in vitro fertilisation in patients with non-male  
52 subfertility. *Cochrane Database Syst Rev*. 2003(2):CD001301.
  - 53
  - 54
  - 55
  - 56
  - 57
  - 58
  - 59
  - 60

1 INVICSI: study protocol for a randomised, controlled multicentre trial

2 Version: 5.0

3 Date: May 06, 2021

- 4
- 5 20. Butts SF, Owen C, Mainigi M, et al. Assisted hatching and intracytoplasmic sperm injection  
6 are not associated with improved outcomes in assisted reproduction cycles for diminished ovarian reserve:  
7 an analysis of cycles in the United States from 2004 to 2011. *Fertil Steril*. 2014;102(4):1041-7 e1.
- 8 21. Luna M, Bigelow C, Duke M, et al. Should ICSI be recommended routinely in patients with  
9 four or fewer oocytes retrieved? *J Assist Reprod Genet*. 2011;28(10):911-5.
- 10 22. van der Westerlaken L, Helmerhorst F, Dieben S, et al. Intracytoplasmic sperm injection as a  
11 treatment for unexplained total fertilization failure or low fertilization after conventional in vitro  
12 fertilization. *Fertil Steril*. 2005;83(3):612-7.
- 13 23. Chan AW, Tetzlaff JM, Gotzsche PC, et al. SPIRIT 2013 explanation and elaboration: guidance  
14 for protocols of clinical trials. *BMJ*. 2013;346:e7586.
- 15 24. Kohn TP, Kohn JR, Ramasamy R. Effect of Sperm Morphology on Pregnancy Success via  
16 Intrauterine Insemination: A Systematic Review and Meta-Analysis. *J Urol*. 2018;199(3):812-22.
- 17 25. Kohn TP, Kohn JR, Lamb DJ. Role of Sperm Morphology in Deciding Between Various Assisted  
18 Reproduction Technologies. *Eur Urol Focus*. 2018;4(3):311-3.
- 19 26. Lemmens L, Kos S, Beijer C, et al. Predictive value of sperm morphology and progressively  
20 motile sperm count for pregnancy outcomes in intrauterine insemination. *Fertil Steril*. 2016;105(6):1462-8.
- 21 27. Deveneau NE, Sinno O, Krause M, et al. Impact of sperm morphology on the likelihood of  
22 pregnancy after intrauterine insemination. *Fertil Steril*. 2014;102(6):1584-90 e2.
- 23 28. Hotaling JM, Smith JF, Rosen M, et al. The relationship between isolated teratozoospermia  
24 and clinical pregnancy after in vitro fertilization with or without intracytoplasmic sperm injection: a  
25 systematic review and meta-analysis. *Fertil Steril*. 2011;95(3):1141-5.
- 26 29. Sha T, Wang X, Cheng W, et al. A meta-analysis of pregnancy-related outcomes and  
27 complications in women with polycystic ovary syndrome undergoing IVF. *Reprod Biomed Online*.  
28 2019;39(2):281-93.
- 29 30. Sigala J, Sifer C, Dewailly D, et al. Is polycystic ovarian morphology related to a poor oocyte  
30 quality after controlled ovarian hyperstimulation for intracytoplasmic sperm injection? Results from a  
31 prospective, comparative study. *Fertil Steril*. 2015;103(1):112-8.
- 32 31. Heijnen EM, Eijkemans MJ, Hughes EG, et al. A meta-analysis of outcomes of conventional  
33 IVF in women with polycystic ovary syndrome. *Hum Reprod Update*. 2006;12(1):13-21.
- 34 32. Harris PA, Taylor R, Thielke R, et al. Research electronic data capture (REDCap)--a metadata-  
35 driven methodology and workflow process for providing translational research informatics support. *J*  
36 *Biomed Inform*. 2009;42(2):377-81.
- 37  
38  
39  
40  
41  
42  
43  
44  
45  
46  
47  
48  
49  
50  
51  
52  
53  
54  
55  
56  
57  
58  
59  
60

INVICSI: study protocol for a randomised, controlled multicentre trial

Version: 5.0

Date: May 06, 2021

**Table 1. Trial registration data**

| Data category                                 | Information                                                                                                                                                                                                                                                                                                                                                                                                                                                                                                   |
|-----------------------------------------------|---------------------------------------------------------------------------------------------------------------------------------------------------------------------------------------------------------------------------------------------------------------------------------------------------------------------------------------------------------------------------------------------------------------------------------------------------------------------------------------------------------------|
| Primary registry and trial identifying number | ClinicalTrials.gov ID: NCT04128904, Protocol ID: INVICSI2019                                                                                                                                                                                                                                                                                                                                                                                                                                                  |
| Date of registration in primary registry      | July 10, 2019                                                                                                                                                                                                                                                                                                                                                                                                                                                                                                 |
| Secondary identifying numbers                 | H-19022201                                                                                                                                                                                                                                                                                                                                                                                                                                                                                                    |
| Source(s) of monetary or material support     | Capital Region of Denmark<br>Gedeon Richter                                                                                                                                                                                                                                                                                                                                                                                                                                                                   |
| Primary sponsor                               | Copenhagen University Hospital Hvidovre                                                                                                                                                                                                                                                                                                                                                                                                                                                                       |
| Secondary sponsor(s)                          | None                                                                                                                                                                                                                                                                                                                                                                                                                                                                                                          |
| Contact for public queries                    | SB ( <a href="mailto:sineberntsen@gmail.com">sineberntsen@gmail.com</a> )                                                                                                                                                                                                                                                                                                                                                                                                                                     |
| Contact for scientific queries                | SB, NCF<br>Department of Obstetrics and Gynaecology<br>The Fertility Clinic, Hvidovre<br>Copenhagen University Hospital Hvidovre                                                                                                                                                                                                                                                                                                                                                                              |
| Public title                                  | INVICSI – IVF versus ICSI in patients without severe male factor infertility                                                                                                                                                                                                                                                                                                                                                                                                                                  |
| Scientific title                              | In vitro fertilisation (IVF) versus intracytoplasmic sperm injection (ICSI) in patients without severe male factor infertility (INVICSI): a randomised, controlled, multicentre trial                                                                                                                                                                                                                                                                                                                         |
| Countries of recruitment                      | Denmark                                                                                                                                                                                                                                                                                                                                                                                                                                                                                                       |
| Health condition(s) or problem(s) studied     | Methods of insemination (ICSI vs. conventional IVF), Infertility without severe male factor                                                                                                                                                                                                                                                                                                                                                                                                                   |
| Intervention(s)                               | Active comparator: Insemination with ICSI<br>Active comparator: Insemination with conventional IVF                                                                                                                                                                                                                                                                                                                                                                                                            |
| Key inclusion and exclusion criteria          | Inclusion: Age of the woman 18-42 years, BMI of the woman between 18-35 kg/m <sup>2</sup> , Male partner with normal or non-severely decreased sperm parameters or use of donor sperm<br>Exclusion: Previous IVF or ICSI treatments with current partner, Use of donor oocytes or frozen oocytes, Ovarian cysts >4 cm, Known liver or kidney disease, Unregulated thyroid disease, Endometriosis stage 3-4, Hypogonadotropic hypogonadism, Other severe comorbidity (e.g. diabetes or cardiovascular disease) |
| Study type                                    | Randomised controlled multicenter trial using a parallel arm design. Randomisation 1:1 to receive insemination with ICSI or conventional IVF                                                                                                                                                                                                                                                                                                                                                                  |

INVICSI: study protocol for a randomised, controlled multicentre trial

Version: 5.0

Date: May 06, 2021

|                         |                                                                                                                                                                                                                                          |
|-------------------------|------------------------------------------------------------------------------------------------------------------------------------------------------------------------------------------------------------------------------------------|
| Date of first enrolment | November 29, 2019                                                                                                                                                                                                                        |
| Target sample size      | 824                                                                                                                                                                                                                                      |
| Recruitment status      | Recruiting                                                                                                                                                                                                                               |
| Primary outcome(s)      | First live birth rate: the number of first live birth episodes from the study oocyte collections including transfer of fresh- and frozen-thawed embryos                                                                                  |
| Key secondary outcomes  | Cycles with total fertilisation failure, fertilisation rate, embryo quality, positive pregnancy test rate, ongoing pregnancy rate, pregnancy loss rate, all live birth episodes, preterm delivery, birth weight and congenital anomalies |

**Table 2. Protocol, Revision chronology**

| Version     | Date of approval  | Primary reasons for amendment                                                                                                                                                                                                                  |
|-------------|-------------------|------------------------------------------------------------------------------------------------------------------------------------------------------------------------------------------------------------------------------------------------|
| Original    | August 8, 2019    |                                                                                                                                                                                                                                                |
| Amendment 1 | January 28, 2020  | New trial site added (The Fertility Clinic, Regional Hospital Horsens)                                                                                                                                                                         |
| Amendment 2 | March 20, 2020    | Removed inclusion criteria: (i) Regular menstrual cycles (21-35 days). (ii) Diagnostic sperm sample from the male partner with $\geq 4\%$ morphologically normal spermatozoa<br>Added section: Handling of poor semen sample on the day of OPU |
| Amendment 3 | September 2, 2020 | New trial site added (The Fertility Clinic, Zealand University Hospital)                                                                                                                                                                       |

INVICSI: study protocol for a randomised, controlled multicentre trial

Version: 5.0

Date: May 06, 2021

|                                          |                           |                                                                                                                                                                                                                                                                                                                                                                                                                                                                 |
|------------------------------------------|---------------------------|-----------------------------------------------------------------------------------------------------------------------------------------------------------------------------------------------------------------------------------------------------------------------------------------------------------------------------------------------------------------------------------------------------------------------------------------------------------------|
| <p>Amendment 4<br/>(Current version)</p> | <p>September 16, 2020</p> | <p>Removed inclusion criteria:<br/>Treatment with donor sperm or male partner sperm with a minimum concentration of 5 million progressive motile spermatozoa in a (purified) <i>diagnostic</i> semen sample.</p> <p>Added inclusion criteria:<br/>Male partner with normal or non-severely decreased sperm parameters where the sperm sample (purified) on the day of oocyte pick up is expected to contain a minimum of 2 million progressive spermatozoa.</p> |
|------------------------------------------|---------------------------|-----------------------------------------------------------------------------------------------------------------------------------------------------------------------------------------------------------------------------------------------------------------------------------------------------------------------------------------------------------------------------------------------------------------------------------------------------------------|

For peer review only

**Table 3. Secondary outcomes**

| Outcome       | Assessment                                                                                                                    |
|---------------|-------------------------------------------------------------------------------------------------------------------------------|
| Fertilisation | Fertilisation rate per aspirated oocyte retrieved (16-20 hours after IVF/ICSI) defined as the appearance of 2 pronuclei (PN). |
|               | Cycles with total fertilisation failure.                                                                                      |
| Embryo data   | Embryo quality (i.e. good quality blastocysts according to Gardner classification).                                           |
|               | Embryo time-lapse kinetics including cleavage patterns.                                                                       |
|               | Embryo utilisation rate (number of transferred + cryopreserved embryos per number of 2 PN zygotes).                           |
| Freeze        | Number of frozen blastocysts (time frame: up to six days after oocyte pick-up (OPU)).                                         |
| Pregnancy     | Positive pregnancy test (positive urine or serum hCG 11-21 days after embryo transfer).                                       |
|               | Multiple pregnancy (period: up to 12 weeks after embryo transfer).<br>Number of intrauterine gestations.                      |
|               | Ongoing pregnancy per transfer (fetal heartbeat on ultrasound in gestational week 7-8).                                       |
| Miscarriage   | Pregnancy loss rate (period: up to 12 weeks after embryo transfer).                                                           |



INVICSI: study protocol for a randomised, controlled multicentre trial

Version: 5.0

Date: May 06, 2021

|                               |                                                                                                                                                                      |
|-------------------------------|----------------------------------------------------------------------------------------------------------------------------------------------------------------------|
|                               |                                                                                                                                                                      |
|                               | <p><b>Biochemical pregnancies</b> (positive urine or serum hCG 11-21 days after embryo transfer without any clinical signs of intra- or extrauterine pregnancy).</p> |
|                               | <p><b>Ectopic pregnancy/pregnancy of unknown location (PUL)</b></p>                                                                                                  |
| <p><b>Birth/offspring</b></p> | <p><b>All live birth episodes</b> (all live births from the study oocyte collection (including second and further live births)</p>                                   |
|                               | <p><b>Preterm delivery</b> (delivery at gestational week 22-36+6).</p>                                                                                               |
|                               | <p><b>Birth weight/weight for gestational age.</b></p>                                                                                                               |
|                               | <p><b>Congenital anomaly</b> diagnosed at birth.</p>                                                                                                                 |

**Birth/offspring**

# Reporting checklist for protocol of a clinical trial.

Based on the SPIRIT guidelines.

## Instructions to authors

Complete this checklist by entering the page numbers from your manuscript where readers will find each of the items listed below.

Your article may not currently address all the items on the checklist. Please modify your text to include the missing information. If you are certain that an item does not apply, please write "n/a" and provide a short explanation.

Upload your completed checklist as an extra file when you submit to a journal.

In your methods section, say that you used the SPIRIT reporting guidelines, and cite them as:

Chan A-W, Tetzlaff JM, Gøtzsche PC, Altman DG, Mann H, Berlin J, Dickersin K, Hróbjartsson A, Schulz KF, Parulekar WR, Krleža-Jerić K, Laupacis A, Moher D. SPIRIT 2013 Explanation and Elaboration: Guidance for protocols of clinical trials. *BMJ*. 2013;346:e7586

|                                   |                     |                                                                                                              | Page   |
|-----------------------------------|---------------------|--------------------------------------------------------------------------------------------------------------|--------|
|                                   |                     | Reporting Item                                                                                               | Number |
| <b>Administrative information</b> |                     |                                                                                                              |        |
| Title                             | <a href="#">#1</a>  | Descriptive title identifying the study design, population, interventions, and, if applicable, trial acronym | 1      |
| Trial registration                | <a href="#">#2a</a> | Trial identifier and registry name. If not yet registered,                                                   | 2      |

|    |                          |                                                                                  |       |
|----|--------------------------|----------------------------------------------------------------------------------|-------|
| 1  |                          | name of intended registry                                                        |       |
| 2  |                          |                                                                                  |       |
| 3  |                          |                                                                                  |       |
| 4  | Trial registration: data | <a href="#">#2b</a> All items from the World Health Organization Trial           | 14    |
| 5  |                          |                                                                                  |       |
| 6  | set                      | Registration Data Set                                                            |       |
| 7  |                          |                                                                                  |       |
| 8  |                          |                                                                                  |       |
| 9  | Protocol version         | <a href="#">#3</a> Date and version identifier                                   | 15    |
| 10 |                          |                                                                                  |       |
| 11 |                          |                                                                                  |       |
| 12 | Funding                  | <a href="#">#4</a> Sources and types of financial, material, and other support   | 11    |
| 13 |                          |                                                                                  |       |
| 14 |                          |                                                                                  |       |
| 15 | Roles and                | <a href="#">#5a</a> Names, affiliations, and roles of protocol contributors      | 1, 11 |
| 16 |                          |                                                                                  |       |
| 17 | responsibilities:        |                                                                                  |       |
| 18 |                          |                                                                                  |       |
| 19 | contributorship          |                                                                                  |       |
| 20 |                          |                                                                                  |       |
| 21 |                          |                                                                                  |       |
| 22 |                          |                                                                                  |       |
| 23 | Roles and                | <a href="#">#5b</a> Name and contact information for the trial sponsor           | 14    |
| 24 |                          |                                                                                  |       |
| 25 | responsibilities:        |                                                                                  |       |
| 26 |                          |                                                                                  |       |
| 27 | sponsor contact          |                                                                                  |       |
| 28 |                          |                                                                                  |       |
| 29 | information              |                                                                                  |       |
| 30 |                          |                                                                                  |       |
| 31 |                          |                                                                                  |       |
| 32 |                          |                                                                                  |       |
| 33 | Roles and                | <a href="#">#5c</a> Role of study sponsor and funders, if any, in study design;  | 11    |
| 34 |                          |                                                                                  |       |
| 35 | responsibilities:        | collection, management, analysis, and interpretation of                          |       |
| 36 |                          |                                                                                  |       |
| 37 | sponsor and funder       | data; writing of the report; and the decision to submit the                      |       |
| 38 |                          |                                                                                  |       |
| 39 |                          | report for publication, including whether they will have                         |       |
| 40 |                          |                                                                                  |       |
| 41 |                          | ultimate authority over any of these activities                                  |       |
| 42 |                          |                                                                                  |       |
| 43 |                          |                                                                                  |       |
| 44 |                          |                                                                                  |       |
| 45 | Roles and                | <a href="#">#5d</a> Composition, roles, and responsibilities of the coordinating | n/a   |
| 46 |                          |                                                                                  |       |
| 47 | responsibilities:        | centre, steering committee, endpoint adjudication                                |       |
| 48 |                          |                                                                                  |       |
| 49 | committees               | committee, data management team, and other individuals                           |       |
| 50 |                          |                                                                                  |       |
| 51 |                          | or groups overseeing the trial, if applicable (see Item 21a                      |       |
| 52 |                          |                                                                                  |       |
| 53 |                          | for data monitoring committee)                                                   |       |
| 54 |                          |                                                                                  |       |
| 55 |                          |                                                                                  |       |
| 56 |                          |                                                                                  |       |
| 57 | <b>Introduction</b>      |                                                                                  |       |
| 58 |                          |                                                                                  |       |
| 59 |                          |                                                                                  |       |
| 60 |                          |                                                                                  |       |

|    |                           |                     |                                                                   |     |
|----|---------------------------|---------------------|-------------------------------------------------------------------|-----|
| 1  | Background and            | <a href="#">#6a</a> | Description of research question and justification for            | 3-4 |
| 2  |                           |                     |                                                                   |     |
| 3  | rationale                 |                     | undertaking the trial, including summary of relevant studies      |     |
| 4  |                           |                     | (published and unpublished) examining benefits and harms          |     |
| 5  |                           |                     | for each intervention                                             |     |
| 6  |                           |                     |                                                                   |     |
| 7  |                           |                     |                                                                   |     |
| 8  |                           |                     |                                                                   |     |
| 9  |                           |                     |                                                                   |     |
| 10 |                           |                     |                                                                   |     |
| 11 | Background and            | <a href="#">#6b</a> | Explanation for choice of comparators                             | 3-4 |
| 12 |                           |                     |                                                                   |     |
| 13 | rationale: choice of      |                     |                                                                   |     |
| 14 |                           |                     |                                                                   |     |
| 15 | comparators               |                     |                                                                   |     |
| 16 |                           |                     |                                                                   |     |
| 17 |                           |                     |                                                                   |     |
| 18 | Objectives                | <a href="#">#7</a>  | Specific objectives or hypotheses                                 | 4   |
| 19 |                           |                     |                                                                   |     |
| 20 |                           |                     |                                                                   |     |
| 21 |                           |                     |                                                                   |     |
| 22 | Trial design              | <a href="#">#8</a>  | Description of trial design including type of trial (eg, parallel | 4   |
| 23 |                           |                     | group, crossover, factorial, single group), allocation ratio,     |     |
| 24 |                           |                     | and framework (eg, superiority, equivalence, non-inferiority,     |     |
| 25 |                           |                     | exploratory)                                                      |     |
| 26 |                           |                     |                                                                   |     |
| 27 |                           |                     |                                                                   |     |
| 28 |                           |                     |                                                                   |     |
| 29 |                           |                     |                                                                   |     |
| 30 |                           |                     |                                                                   |     |
| 31 | <b>Methods:</b>           |                     |                                                                   |     |
| 32 |                           |                     |                                                                   |     |
| 33 | <b>Participants,</b>      |                     |                                                                   |     |
| 34 |                           |                     |                                                                   |     |
| 35 | <b>interventions, and</b> |                     |                                                                   |     |
| 36 |                           |                     |                                                                   |     |
| 37 | <b>outcomes</b>           |                     |                                                                   |     |
| 38 |                           |                     |                                                                   |     |
| 39 |                           |                     |                                                                   |     |
| 40 |                           |                     |                                                                   |     |
| 41 | Study setting             | <a href="#">#9</a>  | Description of study settings (eg, community clinic,              | 4-5 |
| 42 |                           |                     | academic hospital) and list of countries where data will be       |     |
| 43 |                           |                     | collected. Reference to where list of study sites can be          |     |
| 44 |                           |                     | obtained                                                          |     |
| 45 |                           |                     |                                                                   |     |
| 46 |                           |                     |                                                                   |     |
| 47 |                           |                     |                                                                   |     |
| 48 |                           |                     |                                                                   |     |
| 49 |                           |                     |                                                                   |     |
| 50 |                           |                     |                                                                   |     |
| 51 | Eligibility criteria      | <a href="#">#10</a> | Inclusion and exclusion criteria for participants. If             | 5   |
| 52 |                           |                     | applicable, eligibility criteria for study centres and            |     |
| 53 |                           |                     | individuals who will perform the interventions (eg,               |     |
| 54 |                           |                     |                                                                   |     |
| 55 |                           |                     |                                                                   |     |
| 56 |                           |                     |                                                                   |     |
| 57 |                           |                     |                                                                   |     |
| 58 |                           |                     |                                                                   |     |
| 59 |                           |                     |                                                                   |     |
| 60 |                           |                     |                                                                   |     |

|    |                      |                                                                                   |      |
|----|----------------------|-----------------------------------------------------------------------------------|------|
|    |                      | surgeons, psychotherapists)                                                       |      |
| 1  |                      |                                                                                   |      |
| 2  |                      |                                                                                   |      |
| 3  |                      |                                                                                   |      |
| 4  | Interventions:       | <a href="#">#11a</a> Interventions for each group with sufficient detail to allow | 7-8  |
| 5  |                      |                                                                                   |      |
| 6  | description          | replication, including how and when they will be                                  |      |
| 7  |                      |                                                                                   |      |
| 8  |                      | administered                                                                      |      |
| 9  |                      |                                                                                   |      |
| 10 |                      |                                                                                   |      |
| 11 | Interventions:       | <a href="#">#11b</a> Criteria for discontinuing or modifying allocated            | 7    |
| 12 |                      |                                                                                   |      |
| 13 | modifications        | interventions for a given trial participant (eg, drug dose                        |      |
| 14 |                      |                                                                                   |      |
| 15 |                      | change in response to harms, participant request, or                              |      |
| 16 |                      |                                                                                   |      |
| 17 |                      | improving / worsening disease)                                                    |      |
| 18 |                      |                                                                                   |      |
| 19 |                      |                                                                                   |      |
| 20 |                      |                                                                                   |      |
| 21 | Interventions:       | <a href="#">#11c</a> Strategies to improve adherence to intervention protocols,   | n/a  |
| 22 |                      |                                                                                   |      |
| 23 | adherence            | and any procedures for monitoring adherence (eg, drug                             |      |
| 24 |                      |                                                                                   |      |
| 25 |                      | tablet return; laboratory tests)                                                  |      |
| 26 |                      |                                                                                   |      |
| 27 |                      |                                                                                   |      |
| 28 |                      |                                                                                   |      |
| 29 | Interventions:       | <a href="#">#11d</a> Relevant concomitant care and interventions that are         | n/a  |
| 30 |                      |                                                                                   |      |
| 31 | concomitant care     | permitted or prohibited during the trial                                          |      |
| 32 |                      |                                                                                   |      |
| 33 |                      |                                                                                   |      |
| 34 | Outcomes             | <a href="#">#12</a> Primary, secondary, and other outcomes, including the         | 8,16 |
| 35 |                      |                                                                                   |      |
| 36 |                      | specific measurement variable (eg, systolic blood                                 |      |
| 37 |                      |                                                                                   |      |
| 38 |                      | pressure), analysis metric (eg, change from baseline, final                       |      |
| 39 |                      |                                                                                   |      |
| 40 |                      | value, time to event), method of aggregation (eg, median,                         |      |
| 41 |                      |                                                                                   |      |
| 42 |                      | proportion), and time point for each outcome. Explanation                         |      |
| 43 |                      |                                                                                   |      |
| 44 |                      | of the clinical relevance of chosen efficacy and harm                             |      |
| 45 |                      |                                                                                   |      |
| 46 |                      | outcomes is strongly recommended                                                  |      |
| 47 |                      |                                                                                   |      |
| 48 |                      |                                                                                   |      |
| 49 |                      |                                                                                   |      |
| 50 |                      |                                                                                   |      |
| 51 | Participant timeline | <a href="#">#13</a> Time schedule of enrolment, interventions (including any      | 5-6  |
| 52 |                      |                                                                                   |      |
| 53 |                      | run-ins and washouts), assessments, and visits for                                |      |
| 54 |                      |                                                                                   |      |
| 55 |                      | participants. A schematic diagram is highly recommended                           |      |
| 56 |                      |                                                                                   |      |
| 57 |                      | (see Figure)                                                                      |      |
| 58 |                      |                                                                                   |      |
| 59 |                      |                                                                                   |      |
| 60 |                      |                                                                                   |      |

|    |                                  |                      |                                                                                                                                                                                                                                                                                                                                                          |     |
|----|----------------------------------|----------------------|----------------------------------------------------------------------------------------------------------------------------------------------------------------------------------------------------------------------------------------------------------------------------------------------------------------------------------------------------------|-----|
| 1  | Sample size                      | <a href="#">#14</a>  | Estimated number of participants needed to achieve study objectives and how it was determined, including clinical and statistical assumptions supporting any sample size calculations                                                                                                                                                                    | 9   |
| 2  |                                  |                      |                                                                                                                                                                                                                                                                                                                                                          |     |
| 3  |                                  |                      |                                                                                                                                                                                                                                                                                                                                                          |     |
| 4  |                                  |                      |                                                                                                                                                                                                                                                                                                                                                          |     |
| 5  |                                  |                      |                                                                                                                                                                                                                                                                                                                                                          |     |
| 6  |                                  |                      |                                                                                                                                                                                                                                                                                                                                                          |     |
| 7  |                                  |                      |                                                                                                                                                                                                                                                                                                                                                          |     |
| 8  |                                  |                      |                                                                                                                                                                                                                                                                                                                                                          |     |
| 9  |                                  |                      |                                                                                                                                                                                                                                                                                                                                                          |     |
| 10 |                                  |                      |                                                                                                                                                                                                                                                                                                                                                          |     |
| 11 | Recruitment                      | <a href="#">#15</a>  | Strategies for achieving adequate participant enrolment to reach target sample size                                                                                                                                                                                                                                                                      | n/a |
| 12 |                                  |                      |                                                                                                                                                                                                                                                                                                                                                          |     |
| 13 |                                  |                      |                                                                                                                                                                                                                                                                                                                                                          |     |
| 14 |                                  |                      |                                                                                                                                                                                                                                                                                                                                                          |     |
| 15 |                                  |                      |                                                                                                                                                                                                                                                                                                                                                          |     |
| 16 | <b>Methods: Assignment</b>       |                      |                                                                                                                                                                                                                                                                                                                                                          |     |
| 17 | <b>of interventions (for</b>     |                      |                                                                                                                                                                                                                                                                                                                                                          |     |
| 18 | <b>controlled trials)</b>        |                      |                                                                                                                                                                                                                                                                                                                                                          |     |
| 19 |                                  |                      |                                                                                                                                                                                                                                                                                                                                                          |     |
| 20 |                                  |                      |                                                                                                                                                                                                                                                                                                                                                          |     |
| 21 |                                  |                      |                                                                                                                                                                                                                                                                                                                                                          |     |
| 22 |                                  |                      |                                                                                                                                                                                                                                                                                                                                                          |     |
| 23 |                                  |                      |                                                                                                                                                                                                                                                                                                                                                          |     |
| 24 | Allocation: sequence generation  | <a href="#">#16a</a> | Method of generating the allocation sequence (eg, computer-generated random numbers), and list of any factors for stratification. To reduce predictability of a random sequence, details of any planned restriction (eg, blocking) should be provided in a separate document that is unavailable to those who enrol participants or assign interventions | 6-7 |
| 25 |                                  |                      |                                                                                                                                                                                                                                                                                                                                                          |     |
| 26 |                                  |                      |                                                                                                                                                                                                                                                                                                                                                          |     |
| 27 |                                  |                      |                                                                                                                                                                                                                                                                                                                                                          |     |
| 28 |                                  |                      |                                                                                                                                                                                                                                                                                                                                                          |     |
| 29 |                                  |                      |                                                                                                                                                                                                                                                                                                                                                          |     |
| 30 |                                  |                      |                                                                                                                                                                                                                                                                                                                                                          |     |
| 31 |                                  |                      |                                                                                                                                                                                                                                                                                                                                                          |     |
| 32 |                                  |                      |                                                                                                                                                                                                                                                                                                                                                          |     |
| 33 |                                  |                      |                                                                                                                                                                                                                                                                                                                                                          |     |
| 34 |                                  |                      |                                                                                                                                                                                                                                                                                                                                                          |     |
| 35 |                                  |                      |                                                                                                                                                                                                                                                                                                                                                          |     |
| 36 |                                  |                      |                                                                                                                                                                                                                                                                                                                                                          |     |
| 37 |                                  |                      |                                                                                                                                                                                                                                                                                                                                                          |     |
| 38 |                                  |                      |                                                                                                                                                                                                                                                                                                                                                          |     |
| 39 |                                  |                      |                                                                                                                                                                                                                                                                                                                                                          |     |
| 40 |                                  |                      |                                                                                                                                                                                                                                                                                                                                                          |     |
| 41 | Allocation concealment mechanism | <a href="#">#16b</a> | Mechanism of implementing the allocation sequence (eg, central telephone; sequentially numbered, opaque, sealed envelopes), describing any steps to conceal the sequence until interventions are assigned                                                                                                                                                | 6-7 |
| 42 |                                  |                      |                                                                                                                                                                                                                                                                                                                                                          |     |
| 43 |                                  |                      |                                                                                                                                                                                                                                                                                                                                                          |     |
| 44 |                                  |                      |                                                                                                                                                                                                                                                                                                                                                          |     |
| 45 |                                  |                      |                                                                                                                                                                                                                                                                                                                                                          |     |
| 46 |                                  |                      |                                                                                                                                                                                                                                                                                                                                                          |     |
| 47 |                                  |                      |                                                                                                                                                                                                                                                                                                                                                          |     |
| 48 |                                  |                      |                                                                                                                                                                                                                                                                                                                                                          |     |
| 49 |                                  |                      |                                                                                                                                                                                                                                                                                                                                                          |     |
| 50 |                                  |                      |                                                                                                                                                                                                                                                                                                                                                          |     |
| 51 | Allocation: implementation       | <a href="#">#16c</a> | Who will generate the allocation sequence, who will enrol participants, and who will assign participants to interventions                                                                                                                                                                                                                                | 6-7 |
| 52 |                                  |                      |                                                                                                                                                                                                                                                                                                                                                          |     |
| 53 |                                  |                      |                                                                                                                                                                                                                                                                                                                                                          |     |
| 54 |                                  |                      |                                                                                                                                                                                                                                                                                                                                                          |     |
| 55 |                                  |                      |                                                                                                                                                                                                                                                                                                                                                          |     |
| 56 |                                  |                      |                                                                                                                                                                                                                                                                                                                                                          |     |
| 57 |                                  |                      |                                                                                                                                                                                                                                                                                                                                                          |     |
| 58 |                                  |                      |                                                                                                                                                                                                                                                                                                                                                          |     |
| 59 |                                  |                      |                                                                                                                                                                                                                                                                                                                                                          |     |
| 60 |                                  |                      |                                                                                                                                                                                                                                                                                                                                                          |     |

|    |                        |                      |                                                                |     |
|----|------------------------|----------------------|----------------------------------------------------------------|-----|
| 1  | Blinding (masking)     | <a href="#">#17a</a> | Who will be blinded after assignment to interventions (eg,     | n/a |
| 2  |                        |                      | trial participants, care providers, outcome assessors, data    |     |
| 3  |                        |                      | analysts), and how                                             |     |
| 4  |                        |                      |                                                                |     |
| 5  |                        |                      |                                                                |     |
| 6  |                        |                      |                                                                |     |
| 7  |                        |                      |                                                                |     |
| 8  | Blinding (masking):    | <a href="#">#17b</a> | If blinded, circumstances under which unblinding is            | n/a |
| 9  | emergency              |                      | permissible, and procedure for revealing a participant's       |     |
| 10 |                        |                      | allocated intervention during the trial                        |     |
| 11 | unblinding             |                      |                                                                |     |
| 12 |                        |                      |                                                                |     |
| 13 |                        |                      |                                                                |     |
| 14 |                        |                      |                                                                |     |
| 15 |                        |                      |                                                                |     |
| 16 | <b>Methods: Data</b>   |                      |                                                                |     |
| 17 | <b>collection,</b>     |                      |                                                                |     |
| 18 | <b>management, and</b> |                      |                                                                |     |
| 19 | <b>analysis</b>        |                      |                                                                |     |
| 20 |                        |                      |                                                                |     |
| 21 |                        |                      |                                                                |     |
| 22 |                        |                      |                                                                |     |
| 23 |                        |                      |                                                                |     |
| 24 |                        |                      |                                                                |     |
| 25 |                        |                      |                                                                |     |
| 26 | Data collection plan   | <a href="#">#18a</a> | Plans for assessment and collection of outcome, baseline,      | 8-9 |
| 27 |                        |                      | and other trial data, including any related processes to       |     |
| 28 |                        |                      | promote data quality (eg, duplicate measurements, training     |     |
| 29 |                        |                      | of assessors) and a description of study instruments (eg,      |     |
| 30 |                        |                      | questionnaires, laboratory tests) along with their reliability |     |
| 31 |                        |                      | and validity, if known. Reference to where data collection     |     |
| 32 |                        |                      | forms can be found, if not in the protocol                     |     |
| 33 |                        |                      |                                                                |     |
| 34 |                        |                      |                                                                |     |
| 35 |                        |                      |                                                                |     |
| 36 |                        |                      |                                                                |     |
| 37 |                        |                      |                                                                |     |
| 38 |                        |                      |                                                                |     |
| 39 |                        |                      |                                                                |     |
| 40 |                        |                      |                                                                |     |
| 41 |                        |                      |                                                                |     |
| 42 |                        |                      |                                                                |     |
| 43 | Data collection plan:  | <a href="#">#18b</a> | Plans to promote participant retention and complete follow-    | n/a |
| 44 | retention              |                      | up, including list of any outcome data to be collected for     |     |
| 45 |                        |                      | participants who discontinue or deviate from intervention      |     |
| 46 |                        |                      | protocols                                                      |     |
| 47 |                        |                      |                                                                |     |
| 48 |                        |                      |                                                                |     |
| 49 |                        |                      |                                                                |     |
| 50 |                        |                      |                                                                |     |
| 51 |                        |                      |                                                                |     |
| 52 |                        |                      |                                                                |     |
| 53 | Data management        | <a href="#">#19</a>  | Plans for data entry, coding, security, and storage,           | 8-9 |
| 54 |                        |                      | including any related processes to promote data quality        |     |
| 55 |                        |                      | (eg, double data entry; range checks for data values).         |     |
| 56 |                        |                      |                                                                |     |
| 57 |                        |                      |                                                                |     |
| 58 |                        |                      |                                                                |     |
| 59 |                        |                      |                                                                |     |
| 60 |                        |                      |                                                                |     |

|    |                            |                                                                                  |     |
|----|----------------------------|----------------------------------------------------------------------------------|-----|
| 1  |                            | Reference to where details of data management                                    |     |
| 2  |                            |                                                                                  |     |
| 3  |                            | procedures can be found, if not in the protocol                                  |     |
| 4  |                            |                                                                                  |     |
| 5  |                            |                                                                                  |     |
| 6  | Statistics: outcomes       | <a href="#">#20a</a> Statistical methods for analysing primary and secondary     | 9   |
| 7  |                            |                                                                                  |     |
| 8  |                            | outcomes. Reference to where other details of the                                |     |
| 9  |                            |                                                                                  |     |
| 10 |                            | statistical analysis plan can be found, if not in the protocol                   |     |
| 11 |                            |                                                                                  |     |
| 12 |                            |                                                                                  |     |
| 13 | Statistics: additional     | <a href="#">#20b</a> Methods for any additional analyses (eg, subgroup and       | 9   |
| 14 |                            |                                                                                  |     |
| 15 | analyses                   | adjusted analyses)                                                               |     |
| 16 |                            |                                                                                  |     |
| 17 |                            |                                                                                  |     |
| 18 |                            |                                                                                  |     |
| 19 | Statistics: analysis       | <a href="#">#20c</a> Definition of analysis population relating to protocol non- | n/a |
| 20 |                            |                                                                                  |     |
| 21 | population and             | adherence (eg, as randomised analysis), and any statistical                      |     |
| 22 |                            |                                                                                  |     |
| 23 | missing data               | methods to handle missing data (eg, multiple imputation)                         |     |
| 24 |                            |                                                                                  |     |
| 25 |                            |                                                                                  |     |
| 26 | <b>Methods: Monitoring</b> |                                                                                  |     |
| 27 |                            |                                                                                  |     |
| 28 |                            |                                                                                  |     |
| 29 | Data monitoring:           | <a href="#">#21a</a> Composition of data monitoring committee (DMC);             | n/a |
| 30 |                            |                                                                                  |     |
| 31 | formal committee           | summary of its role and reporting structure; statement of                        |     |
| 32 |                            |                                                                                  |     |
| 33 |                            | whether it is independent from the sponsor and competing                         |     |
| 34 |                            |                                                                                  |     |
| 35 |                            | interests; and reference to where further details about its                      |     |
| 36 |                            |                                                                                  |     |
| 37 |                            | charter can be found, if not in the protocol. Alternatively, an                  |     |
| 38 |                            |                                                                                  |     |
| 39 |                            | explanation of why a DMC is not needed                                           |     |
| 40 |                            |                                                                                  |     |
| 41 |                            |                                                                                  |     |
| 42 |                            |                                                                                  |     |
| 43 |                            |                                                                                  |     |
| 44 | Data monitoring:           | <a href="#">#21b</a> Description of any interim analyses and stopping            | n/a |
| 45 |                            |                                                                                  |     |
| 46 | interim analysis           | guidelines, including who will have access to these interim                      |     |
| 47 |                            |                                                                                  |     |
| 48 |                            | results and make the final decision to terminate the trial                       |     |
| 49 |                            |                                                                                  |     |
| 50 |                            |                                                                                  |     |
| 51 | Harms                      | <a href="#">#22</a> Plans for collecting, assessing, reporting, and managing     | n/a |
| 52 |                            |                                                                                  |     |
| 53 |                            | solicited and spontaneously reported adverse events and                          |     |
| 54 |                            |                                                                                  |     |
| 55 |                            | other unintended effects of trial interventions or trial                         |     |
| 56 |                            |                                                                                  |     |
| 57 |                            |                                                                                  |     |
| 58 |                            |                                                                                  |     |
| 59 |                            |                                                                                  |     |
| 60 |                            |                                                                                  |     |



|    |                      |                                                                                  |     |
|----|----------------------|----------------------------------------------------------------------------------|-----|
| 1  |                      | conduct                                                                          |     |
| 2  |                      |                                                                                  |     |
| 3  |                      |                                                                                  |     |
| 4  | Auditing             | <a href="#">#23</a> Frequency and procedures for auditing trial conduct, if any, | n/a |
| 5  |                      | and whether the process will be independent from                                 |     |
| 6  |                      | investigators and the sponsor                                                    |     |
| 7  |                      |                                                                                  |     |
| 8  |                      |                                                                                  |     |
| 9  |                      |                                                                                  |     |
| 10 |                      |                                                                                  |     |
| 11 | <b>Ethics and</b>    |                                                                                  |     |
| 12 |                      |                                                                                  |     |
| 13 | <b>dissemination</b> |                                                                                  |     |
| 14 |                      |                                                                                  |     |
| 15 |                      |                                                                                  |     |
| 16 | Research ethics      | <a href="#">#24</a> Plans for seeking research ethics committee / institutional  | 10  |
| 17 | approval             | review board (REC / IRB) approval                                                |     |
| 18 |                      |                                                                                  |     |
| 19 | Protocol             | <a href="#">#25</a> Plans for communicating important protocol modifications     | 4   |
| 20 | amendments           | (eg, changes to eligibility criteria, outcomes, analyses) to                     |     |
| 21 |                      | relevant parties (eg, investigators, REC / IRBs, trial                           |     |
| 22 |                      | participants, trial registries, journals, regulators)                            |     |
| 23 |                      |                                                                                  |     |
| 24 |                      |                                                                                  |     |
| 25 |                      |                                                                                  |     |
| 26 |                      |                                                                                  |     |
| 27 |                      |                                                                                  |     |
| 28 |                      |                                                                                  |     |
| 29 |                      |                                                                                  |     |
| 30 |                      |                                                                                  |     |
| 31 | Consent or assent    | <a href="#">#26a</a> Who will obtain informed consent or assent from potential   | 4   |
| 32 |                      | trial participants or authorised surrogates, and how (see                        |     |
| 33 |                      | Item 32)                                                                         |     |
| 34 |                      |                                                                                  |     |
| 35 |                      |                                                                                  |     |
| 36 |                      |                                                                                  |     |
| 37 |                      |                                                                                  |     |
| 38 |                      |                                                                                  |     |
| 39 | Consent or assent:   | <a href="#">#26b</a> Additional consent provisions for collection and use of     | n/a |
| 40 | ancillary studies    | participant data and biological specimens in ancillary                           |     |
| 41 |                      | studies, if applicable                                                           |     |
| 42 |                      |                                                                                  |     |
| 43 |                      |                                                                                  |     |
| 44 |                      |                                                                                  |     |
| 45 |                      |                                                                                  |     |
| 46 |                      |                                                                                  |     |
| 47 | Confidentiality      | <a href="#">#27</a> How personal information about potential and enrolled        | 9   |
| 48 |                      | participants will be collected, shared, and maintained in                        |     |
| 49 |                      | order to protect confidentiality before, during, and after the                   |     |
| 50 |                      | trial                                                                            |     |
| 51 |                      |                                                                                  |     |
| 52 |                      |                                                                                  |     |
| 53 |                      |                                                                                  |     |
| 54 |                      |                                                                                  |     |
| 55 |                      |                                                                                  |     |
| 56 |                      |                                                                                  |     |
| 57 | Declaration of       | <a href="#">#28</a> Financial and other competing interests for principal        | 11  |
| 58 |                      |                                                                                  |     |
| 59 |                      |                                                                                  |     |
| 60 |                      |                                                                                  |     |

|    |                       |                      |                                                                 |        |
|----|-----------------------|----------------------|-----------------------------------------------------------------|--------|
| 1  | interests             |                      | investigators for the overall trial and each study site         |        |
| 2  |                       |                      |                                                                 |        |
| 3  |                       |                      |                                                                 |        |
| 4  | Data access           | <a href="#">#29</a>  | Statement of who will have access to the final trial dataset,   | 10     |
| 5  |                       |                      | and disclosure of contractual agreements that limit such        |        |
| 6  |                       |                      | access for investigators                                        |        |
| 7  |                       |                      |                                                                 |        |
| 8  |                       |                      |                                                                 |        |
| 9  |                       |                      |                                                                 |        |
| 10 |                       |                      |                                                                 |        |
| 11 | Ancillary and post    | <a href="#">#30</a>  | Provisions, if any, for ancillary and post-trial care, and for  | n/a    |
| 12 |                       |                      | compensation to those who suffer harm from trial                |        |
| 13 | trial care            |                      | participation                                                   |        |
| 14 |                       |                      |                                                                 |        |
| 15 |                       |                      |                                                                 |        |
| 16 |                       |                      |                                                                 |        |
| 17 |                       |                      |                                                                 |        |
| 18 |                       |                      |                                                                 |        |
| 19 | Dissemination policy: | <a href="#">#31a</a> | Plans for investigators and sponsor to communicate trial        | 10     |
| 20 |                       |                      | results to participants, healthcare professionals, the public,  |        |
| 21 | trial results         |                      | and other relevant groups (eg, via publication, reporting in    |        |
| 22 |                       |                      | results databases, or other data sharing arrangements),         |        |
| 23 |                       |                      | including any publication restrictions                          |        |
| 24 |                       |                      |                                                                 |        |
| 25 |                       |                      |                                                                 |        |
| 26 |                       |                      |                                                                 |        |
| 27 |                       |                      |                                                                 |        |
| 28 |                       |                      |                                                                 |        |
| 29 |                       |                      |                                                                 |        |
| 30 |                       |                      |                                                                 |        |
| 31 | Dissemination policy: | <a href="#">#31b</a> | Authorship eligibility guidelines and any intended use of       |        |
| 32 |                       |                      | professional writers                                            |        |
| 33 | authorship            |                      |                                                                 |        |
| 34 |                       |                      |                                                                 |        |
| 35 |                       |                      |                                                                 |        |
| 36 | Dissemination policy: | <a href="#">#31c</a> | Plans, if any, for granting public access to the full protocol, | n/a    |
| 37 |                       |                      | participant-level dataset, and statistical code                 |        |
| 38 | reproducible research |                      |                                                                 |        |
| 39 |                       |                      |                                                                 |        |
| 40 |                       |                      |                                                                 |        |
| 41 |                       |                      |                                                                 |        |
| 42 | <b>Appendices</b>     |                      |                                                                 |        |
| 43 |                       |                      |                                                                 |        |
| 44 |                       |                      |                                                                 |        |
| 45 | Informed consent      | <a href="#">#32</a>  | Model consent form and other related documentation given        | Suppl. |
| 46 |                       |                      | to participants and authorised surrogates                       | file   |
| 47 | materials             |                      |                                                                 |        |
| 48 |                       |                      |                                                                 |        |
| 49 |                       |                      |                                                                 |        |
| 50 | Biological specimens  | <a href="#">#33</a>  | Plans for collection, laboratory evaluation, and storage of     | n/a    |
| 51 |                       |                      | biological specimens for genetic or molecular analysis in       |        |
| 52 |                       |                      | the current trial and for future use in ancillary studies, if   |        |
| 53 |                       |                      | applicable                                                      |        |
| 54 |                       |                      |                                                                 |        |
| 55 |                       |                      |                                                                 |        |
| 56 |                       |                      |                                                                 |        |
| 57 |                       |                      |                                                                 |        |
| 58 |                       |                      |                                                                 |        |
| 59 |                       |                      |                                                                 |        |
| 60 |                       |                      |                                                                 |        |

1 None The SPIRIT checklist is distributed under the terms of the Creative Commons Attribution  
2  
3 License CC-BY-ND 3.0. This checklist can be completed online using <https://www.goodreports.org/>, a  
4  
5 tool made by the [EQUATOR Network](#) in collaboration with [Penelope.ai](#)  
6  
7  
8  
9  
10  
11  
12  
13  
14  
15  
16  
17  
18  
19  
20  
21  
22  
23  
24  
25  
26  
27  
28  
29  
30  
31  
32  
33  
34  
35  
36  
37  
38  
39  
40  
41  
42  
43  
44  
45  
46  
47  
48  
49  
50  
51  
52  
53  
54  
55  
56  
57  
58  
59  
60
